# Supplementary material for: Diurnal variation of high-level clouds from the synergy of AIRS and IASI space-borne infrared sounders
Source: Copernicus journal article supplement (doi:10.5194/acp-2019-166), 2019-03-13
Supplement: Supplementary file [file acp-2019-166-AC1-supplement.pdf]

# Diurnal variation of high-level clouds from the synergy of AIRS and IASI space-borne infrared sounders

Artem G. Feofilov and Claudia J. Stubenrauch

LMD/IPSL, Sorbonne Université, UPMC Univ Paris 06, CNRS, École polytechnique, Palaiseau, 91128, France

Mis en forme : Anglais (Royaume-Uni)

Correspondence to: A. G. Feofilov (artem.feofilov@lmd.polytechnique.fr)

**Abstract.** Among the processes governing the energy balance of our planet, high-level clouds play an important role. Their warming and cooling effects within the atmosphere strongly depend on their emissivity. The combination of cloud data retrieved from two space-borne infrared sounders, the Atmospheric InfraRed Sounder, AIRS, and the Infrared Atmospheric Sounding Interferometer, IASI, which observe the Earth at four local times per day, allows us to investigate the diurnal variation of these high-level clouds, by distinguishing between high opaque, cirrus, and thin cirrus clouds. We demonstrate that the diurnal phase and amplitude of high-level clouds can be estimated from these measurements with an uncertainty of 1.5 h and 20%, respectively. We have applied the developed methodology to AIRS and IASI cloud observations for the period of 2008–2015, we obtained monthly geographical distributions of diurnal phase and amplitude for the period of 2008–2015 at a spatial resolution of  $1^\circ$  latitude  $\times$   $1^\circ$  longitude. In agreement with other studies, the diurnal cycle of high-level clouds is the largest over land in the tropics. At higher latitudes, their diurnal cycle is the largest during the summer. For the selected continental regions of high diurnal activity over land, we found diurnal amplitudes of cloud amount are of about 7 % for high opaque clouds, 9 % for cirrus, and 7 % for thin cirrus clouds, and 9 % for cirrus. Over ocean, these values are 2 to 3 times smaller. The diurnal cycle of tropical thin cirrus seems to be similar over land and over ocean, with a minimum in the morning (9h LT) and a maximum during night (1h LT). Tropical high opaque clouds have a maximum in the evening (21h LT over land), a few hours after the peak of convective rain. This lag can be explained by the fact that this cloud type not only includes the convective cores, but also part of the thicker anvils. Tropical cirrus (with an emissivity  $> 0.5$  or visible optical depth  $> 1.4$ ) show a maximum amount during night (1h LT over land). This lag indicates that they may be a part of the deep convective cloud systems. However, the peak local times also vary regionally. We are providing a global monthly database of detected diurnal cycle amplitude and phase for each of these three high-level cloud types.

## 1 Introduction

Clouds play an important role in the Earth's energy budget through a complex interaction with solar, atmospheric, and terrestrial radiation, air humidity, and aerosols. Optically thick clouds efficiently reflect the incoming solar radiation and, globally, clouds are responsible for about two thirds of the planetary albedo. Thin cirrus keep the planet warm because they

are transparent in the shortwave (SW) and opaque in the long-wave (LW), allowing solar radiation to warm the surface and trapping the outgoing LW radiation, acting as a “greenhouse film”. In addition to these counteracting processes, all clouds emit thermal radiation in all directions in accordance with their temperature, and the radiation escaping the atmosphere cools the planet. The algebraic sign of the net radiative effect of the cloud depends on its height, optical depth, vertical cloud layering, surface albedo and temperature, and local solar time.

Due to the importance of clouds for the Earth’s energy budget, global satellite observations of cloud properties and their diurnal variations are essential for climate studies, for constraining climate models, and for evaluating cloud parameterizations.

Besides the mean amount of different cloud types, their diurnal variation also of clouds modulates the radiative cooling and heating of the atmosphere and of the surface. Both the clouds embedded in the planetary boundary layer and the clouds connected with the surface through deep convection exhibit systematic diurnal variations related to the daily cycle of surface solar heating. The

The International Satellite Cloud Climatology Project (ISCCP, Rossow and Schiffer, 1999) uses multi-spectral imager data from a combination of polar orbiting and geostationary weather satellites to for a globally complete long-term cloud data record at spatial and temporal scales consistent with cloud dynamical processes (approximately 3 hr, 25 km). Although many regional studies were done earlier, the first global analyses of diurnal cloud variations were based on the cloud ISCCP products of the International Cloud Climatology Project (ISCCP), with a global, 3-hourly coverage (Cairns, 1995; Rossow and Cairns, 1995; Rossow and Schiffer, 1999). The. Based on these results, the most notable features of the cloud diurnal cycle are significant differences between the phase of diurnal low-level cloud variations over ocean and land and between the phase of diurnal low-level and high-level cloud variations:

- low-level clouds over ocean have a maximum amount early morning, while over land the maximum is in the early afternoon;
- high-level clouds have a maximum amount early to late evening;
- mid-level clouds have a maximum amount late at night or early morning.

As However, the combination of ISCCP maximal two atmospheric window channels, one IR and one visible, has (the latter not working during night) leads to a low sensitivity of ISCCP to thin cirrus at night and when low-level clouds are underneath, a complementary study, using infrared (IR) sounder (TOVS Path B) to identify high opaque clouds, cirrus and thin cirrus according to their emissivity, yielded the following conclusions (Stubenrauch et al., 2006):

- high opaque clouds over land in By contrast, the tropics and midlatitude summertime have a maximum amount in the evening;
- thin cirrus increase during the afternoon and persist during the night;
- the varying proportions of thinner and thicker cirrus imply a gradual thickening of the cirrus clouds from late afternoon into the night time;

~~• mid-level cloud amount exhibits a small increase during nighttime.~~

The high spectral resolution of the modern IR vertical sounders used in this study allows to select the spectral channels with the contribution functions centred at different heights: the radiances measured near the centre of the 15 $\mu$ m CO<sub>2</sub> absorption band are sensitive to the upper atmospheric layers while the radiances in the absorption band wings are used to probe successively lower levels. Compared to other passive remote sensing instruments, IR sounders are sensitive to cirrus with emissivity as low as 0.1, day and night (Stubenrauch et al. 2010, 2017; Menzel et al., 2016). TIROS-N Operational Vertical Sounder (TOVS) data (TOVS Path-B, Scott et al. 1999) have been used by Stubenrauch et al. (2006) to identify high opaque clouds, cirrus, and thin cirrus according to their emissivity, and by exploiting the time drifting of the afternoon polar orbiting NOAA satellites, in combination with the non-drifting morning orbits, concluded over land in the tropics and midlatitude summertime:

- high opaque clouds have a maximum amount in the evening;

- thin cirrus increase during the afternoon and persist during the night;

- the varying proportions of thinner and thicker cirrus imply a gradual thickening of the cirrus clouds from late afternoon into the night time;

~~• mid-level cloud amount exhibits a small increase during night time.~~

~~As passive instruments are only able to provide information on (2010, 2017; Menzel et al., 2016). As passive instruments determine in general the uppermost cloud layer in the case of multi-level cloud fields, the results on the lower cloud diurnal cycle will be inevitably modulated by the clouds above. Therefore, we concentrate at on the diurnal variation of high-level clouds.~~

The CIRS (Cloud from Infrared Sounders) cloud climatologies established from the Atmospheric InfraRed Sounder (AIRS, Chahine et al., 2006) and the Infrared Atmospheric Sounding Interferometer (IASI, Hilton et al., 2012), now covering 15 and 10 years, respectively, have been presented by Stubenrauch et al. (2017). In this article, we use the synergy of these two instruments, observing each point of the Earth at least at four local times, to build a data base of amplitude and phase of the diurnal cycle of amount and emissivity of high-level clouds, which can further be used for regional and global climate studies and for climate model evaluation.

The structure of the article is as follows. In Section 2, we shortly describe the AIRS and IASI cloud data as well as the environmental data used for this study. Then we present the newly developed approach to estimate the diurnal cycle of cloud amount from a combination of AIRS and IASI observations. Section 3 ~~discusses first presents a comparison of the diurnal variation of high-level cloud amount from our method with results from other datasets (3.1). Then we introduce the diurnal variation separately of high opaque clouds (cloud, cirrus, and thin cirrus), and their atmospheric environment. In particular amount. For specific land regions, we try to establish the links and temporal lags between the different high-level cloud types, the surface temperature, and relative humidity. (Section 3.3). Section 3.4 presents another application: as the combined dataset~~

[covers a period of eight years we analyse the geographical patterns of amplitude change as function of the global surface temperature change.](#) Conclusions are drawn in Section 4.

## 2 Datasets and Methods

### 2.1 Cloud properties from AIRS and IASI

5 Since 2002, the AIRS cross-track scanning instrument aboard the polar orbiting Aqua satellite has been providing very high spectral resolution measurements of atmospheric radiation in 2378 spectral bands in the thermal infrared (3.74–15.40  $\mu\text{m}$ ), at a spatial resolution of about 13.5 km  $\times$  21 km at nadir to 41 km  $\times$  21 km at the scan extremes (Chahine et al., 2006). Local observation times (LT) are 1:30 and 13:30 LT.

IASI aboard the polar orbiting Metop-A platform is a Fourier Transform Spectrometer based on a Michelson interferometer, which covers the IR spectral domain from 3.62 to 15.5  $\mu\text{m}$ . As a cross-track scanner, the swath corresponds to 30 ground fields per scan, each of these measures a 2  $\times$  2 array of footprints. The geometry of IASI observations is similar to that of the AIRS instrument:  $\pm 48.3^\circ$  ground coverage, 12 km resolution at nadir, with observations at 9:30 and 21:30 LT, since 2007.

The CIRS (Clouds from IR Sounders) cloud property retrieval package (Feofilov and Stubenrauch, 2017; Stubenrauch et al., 2017) is based on a weighted  $\chi^2$  method using eight channels along the 15  $\mu\text{m}$  CO<sub>2</sub> absorption band (Stubenrauch et al., 15 ~~1999~~[1999b](#)). It provides cloud pressure ( $p_{\text{cld}}$ ), cloud emissivity ( $\epsilon_{\text{cld}}$ ), cloud temperature ( $T_{\text{cld}}$ ) and cloud height ( $z_{\text{cld}}$ ), as well as their uncertainties. We define the cloud types according to  $p_{\text{cld}}$  and  $\epsilon_{\text{cld}}$ : high-level clouds are the ones with  $p_{\text{cld}} < 440$  hPa, and these are further divided into high opaque ( $\epsilon_{\text{cld}} > 0.95$ ), cirrus ( $0.95 > \epsilon_{\text{cld}} > 0.5$ ), and thin cirrus ( $0.5 > \epsilon_{\text{cld}} > 0.1$ ). Ancillary data (surface temperature, atmospheric temperature and water vapour) are used in the radiative transfer calculations of the retrieval. While the sensitivity of the retrieved cloud properties to ancillary data is small for high-level clouds, the low-level cloud amount is sensitive to surface temperature used in the retrieval (Stubenrauch et al., 2017). To avoid potential [retrieval](#) problems associated with inconsistent ~~retrievals of the~~ ancillary data between AIRS and IASI, we have adopted the same ancillary dataset for both, namely, the ERA-Interim meteorological reanalysis (Dee et al., 2011) by the European Centre for Medium-Range Weather Forecasts (ECMWF), [given 6-hourly at universal time.](#) For the cloud retrieval, the ~~6-hourly reanalysis data, given at universal time.~~ ERA-Interim surface temperature and pressure as well as atmospheric temperature and [water vapour profiles](#) have been ~~transformed and~~ interpolated towards [values at 1:30, 9:30, 13:30, and 21:30 LT.](#) In addition, ~~sea surface temperatures have been slightly corrected for a lack~~ [the local observation times of diurnal variation \(AIRS and IASI, Stubenrauch et al., 2017\).](#)

From Fig. 1, presenting latitudinal distributions of high opaque, cirrus and thin cirrus amount for January and for July, averaged from 2008 to 2015, separately at 01:30, 09:30, 13:30, and 21:30 LT, we deduce that (i) in the tropics (30S–30N) high-level clouds are present more than in half of the ~~observed scenes~~ [observations](#) (the sum of the three cloud types reaches 60%), (ii) tropical high-level cloud amount maximum moves with season towards the summer hemisphere, while the amount of high-level clouds in the midlatitudes is larger in winter, [due to storm tracks](#), and (iii) all cloud types demonstrate a diurnal variation,

but its zonal amplitude is small compared to the zonal mean of the corresponding cloud amount. Fig.1 is the largest around the peak of the InterTropical Convergence Zone (ITCZ), with about 5% for cirrus. Fig.1 will serve as a reference when considering the diurnal amplitudes discussed below.

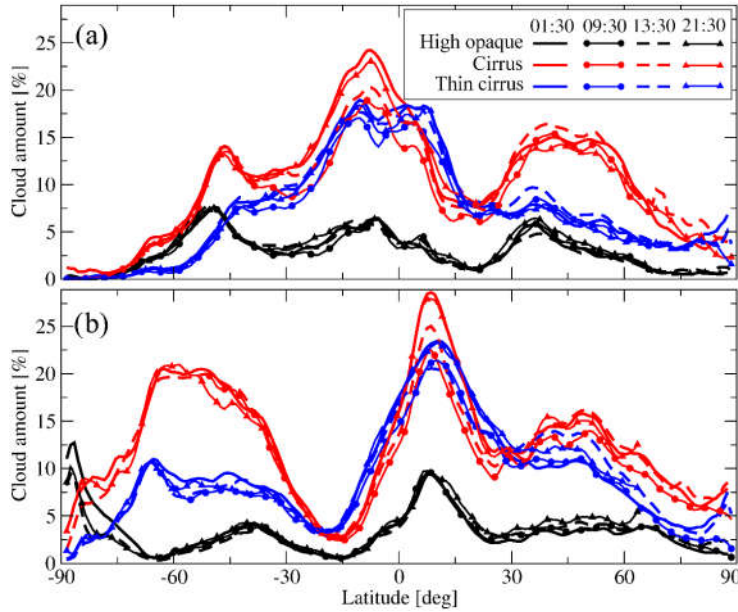

5 Fig.1. Latitudinal distribution of high opaque, cirrus, and thin cirrus cloud amount estimated from AIRS (01:30 and 13:30 LT) and IASI (09:30 and 21:30 LT) by the CIRS retrieval: (a) January; (b) July. Climatological averages over 2008 to 2015.

## 2.2 Estimating the diurnal cycle amplitude and phase

In this section, we develop an approach to identify both the amplitude and the phase (or the “peak time”) of the diurnal variation of cloud amount, using a combination of AIRS and IASI cloud data, with four measurements per day. Both amplitude and phase depend on the cloud type, region, and season (Cairns, 1995; Soden, 2000; Tian et al., 2004; Stubenrauch et al., 2006; Eastman and Warren, 2014, and references therein), so for each location they should be determined individually.

The Nyquist-Shannon-Kotelnikov sampling theorem says: “if a function  $x(t)$  contains no frequencies higher than  $B$  hertz, it is completely determined by giving its ordinates at a series of points spaced  $1/(2B)$  seconds apart”. In application to diurnal variation analysis this means that four measurements per day are just on the edge of the diurnal cycle detectability. In addition, the condition of the theorem is not completely fulfilled since cloud variations in cloud amounts are known to include variations

on both diurnal cycle contains an admixture of a diurnal and semi-diurnal harmonics (e. g. Cairns, 1995), which is clearly beyond the detection limit. Moreover, the sampling of AIRS and IASI measurements is not equidistant in time with its 8 and 4 hour intervals. Correspondingly, one has to use an external source of information to ensure an unambiguous detection of the diurnal cycle and estimate its phase  $\varphi$  and amplitude  $A$ . We found this missing piece of the puzzle in the function describing the general behaviour of the diurnal cloud amount variation as a mixture of two harmonics: diurnal and semi-diurnal, obtained from as demonstrated by the analysis of ISCCP observations (Cairns, 1995).

Cairns (1995) has shown that accordingly the diurnal cycles of high-, middle-, and low-level clouds are well represented by a mixture of two harmonic functions of the following form:

$$A(t) = A_{24} \cdot \sin\left(\frac{2\pi}{24}t + \varphi_{24}\right) + A_{12} \cdot \sin\left(\frac{2\pi}{12}t + \varphi_{24} + \Delta\varphi\right) = A_{24} \cdot \left[\sin\left(\frac{2\pi}{24}t + \varphi_{24}\right) + 0.28 \cdot \sin\left(\frac{2\pi}{12}t + \varphi_{24} + \Delta\varphi\right)\right] \quad (1)$$

where the indices “24” and “12” correspond to diurnal and semi-diurnal harmonics, respectively,  $t$  is time in hours,  $\Delta\varphi$  is the phase shift between semi-diurnal and diurnal harmonics, and the numeric parameters are estimated from Fig. 1 of (Cairns 1995). It is interesting to note that a similar mixture of diurnal and semi-diurnal harmonics describes tropical precipitation (Bowman et al., 2005). Since the ratio of  $A_{12}/A_{24} \approx 0.28$  obtained from (Cairns 1995) does not change

much with the type of the cloud, we simplify the equation to a form shown in the second part of Eq. (1). The phase shift  $\Delta\varphi$  was found to be equal to  $-2$  h for the low- and mid-level clouds and  $0$  h for high-level clouds. Below, we use this ratio throughout the analysis assuming that it is  $A_{12}/A_{24}$  which dominates the diurnal variation. By analysing Fig. 1 of (Cairns, 1995) using least-square fitting of Eq. 1 we found that the phase shift  $\Delta\varphi$  is equal to  $-2$  h for the low- and mid-level clouds and to  $0$  h for high-level clouds. With the  $A_{12}/A_{24}$  set to  $0.28$  and  $\Delta\varphi$  set to  $0$ , the diurnal “shape” of Eq. (1) is fixed (see the grey line in Fig. 2a) and the problem reduces to one of determining the amplitude  $A_{24}$  and  $\varphi_{24}$ . Two satellite instruments provide

us with measurements four times of the day, and we determine the best fit amplitude and phase using a minimization technique based on the “sliding profile” approach as depicted in Fig. 2 and described below. This approach is similar to the one used in (Goldberg et al., 2013) where it was applied to determine the phase and period of interhemispheric coupling. Later in the text we will show that the shape given by Eq. (1) represents the diurnal cycle in clouds better than a simple harmonic fit, but prior to validation of the shape one has to introduce a general diurnal cycle estimation approach itself. The examples shown in Fig. 2 utilize the  $A(t)$  given by Eq. (1), though the approach remains valid for any periodic function.

Figure 2 explains the approach for estimating the diurnal variation phase and amplitude: let us imagine that a real diurnal variation for a given type of cloud at a given location is defined by Eq. (1), with  $A_{12}$ ,  $\varphi_{24}$ ,  $A_{24}$  and  $\Delta\varphi$  known (black curve in Fig. 2a). For this case, the red circles in Fig. 2a correspond to the values obtained at the local observation times of AIRS and IASI, which are passed to the diurnal phase/amplitude estimation algorithm. To test the sensitivity of the approach to the

uncertainties of the amplitudes related to uncertainties of AIRS and IASI cloud amounts, we also consider the case when a 20% random “noise” is added to the amplitudes at the sampled observation times.

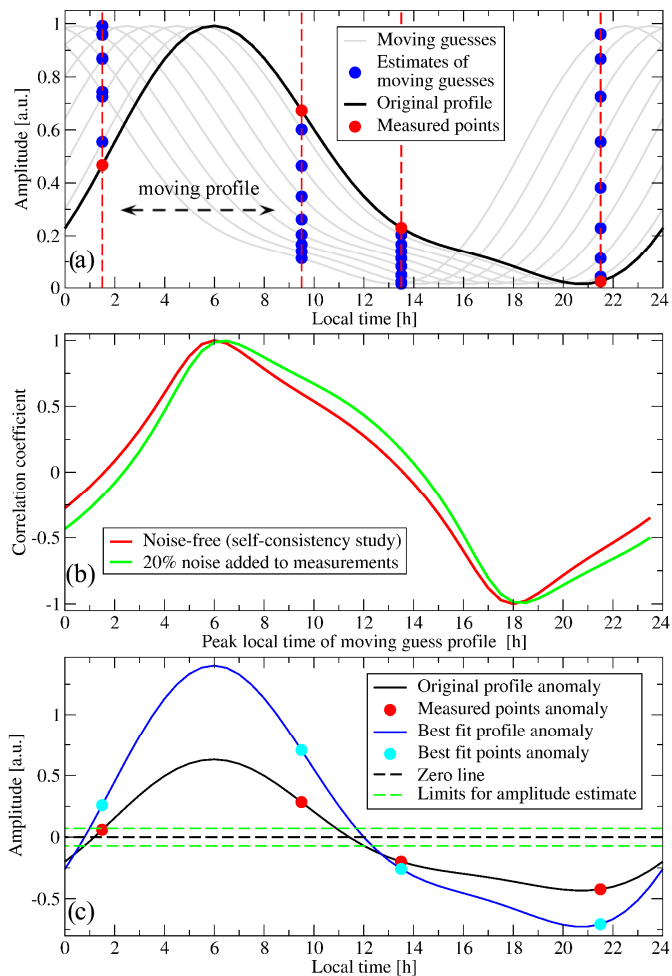

Fig. 2. Illustration of the approach to estimate the diurnal variation phase and amplitude from four measurements, taking advantage of a known form of the variation: a) “True” profile measured at four points and moving guess profiles; b) Pearson’s correlation coefficient calculated for guess profiles for noise-free and noisy simulations; c) determination of the amplitude with the phase known.

This uncertainty was estimated from the most recent CIRS-AIRS and CIRS-IASI cloud products (Stubenrauch et al., 2017) which were compared with active lidar cloud measurements of the CALIPSO mission (Winker et al., 2009). The comparison showed a “hit rate” for individual measurements in the tropics and midlatitudes of the order of 88% over oceans and of 82% over land. (hit rate stands for the ratio of number of cases, for which AIRS cloud detection agrees with CALIOP, to the total number of cases).

The first step in the analysis is to build the function in accordance with Eq. (1) with  $A_0$  corresponding to the cloud type under consideration and an arbitrary amplitude  $A_{24}$ . Then the phase estimation procedure changes: we numerically solve the system for  $\varphi_{24}$  as follows. The  $\varphi_{24}$  by  $\varphi_{24}$  is changed in fine increments, each time calculating  $A(t)$  at the four local observation times of AIRS and IASI (blue circles on grey curves in Fig. 2a). A set of obtained values is compared to a reference “measurement” (red circles), and a Pearson’s correlation coefficient  $k_{corr}$  is calculated for each phase shift (Fig. 2b, phase converted to peak time for the sake of visualization). In the noise-free self-consistency study the maximum of  $k_{corr}$  should exactly match the phase reproducing the original function. The tests show that even 20% random noise added to the “reference” points does not spoil the phase determination by more than half of an hour. Since the peak of the  $k_{corr}$  curve is not sharp, we make a conservative estimate of the uncertainty of our method of phase (or peak local time) determination to be  $\pm 1.5$  h.

With the phase known, we estimate the  $A_{24}$  amplitude (Fig. 2c) as follows: we build an anomaly draw a virtual “zero line” at the level corresponding to a mean of the best-guess profile all four points and calculate the magnitudes at these points with respect to this “zero line”. Then we compare the obtained values with the anomaly of those estimated from the Eq. (1) at the four observation times in the same way (dashed black line in Fig. 2c represents a zero line of Eq. 1). The mean ratio of amplitudes at these points gives an amplitude, which should be substituted into Eq. (1). To avoid  $A_{24}$ . Since using the values close to “zero line” might lead to zero-over-zero type of errors and to an increase of the  $A_{24}$  uncertainty, we pick up only the  $A(t)$  points with the absolute value amplitude greater than 0.2 of the maximal  $|A(t)|$  value. (the threshold is marked by green dashed lines in Fig. 2c). Another way of estimating the amplitude  $A_{24}$  is to compare the maximal spans of the reference profile sampled at four observation times and that of the measured one. We find these methods to be equivalent, but the one involving more points should be less noisy and, therefore, more reliable. The noise in the measured points affects the  $A_{24}$  retrieval uncertainty and our analysis shows that the on  $A_{24}$ , with 20% noise in the source data leads leading to about 20% uncertainty of in the retrieved estimated amplitude.

To justify the choice of the relationship in Eq. (1) for the fitting, we have performed the following numerical experiment using real data: one year of CIRS-AIRS and CIRS-IASI cloud data has been processed using the approach methodology outlined above for two different hypotheses on the fitting functions: a simple harmonic one with a 24-h period and the one following (Cairns, 1995) a mixture of diurnal and semi-diurnal described by Eq. (1). For each tested hypothesis, we have built a



histogram of the best correlation coefficient values, separately for high- and low-level cloud amount diurnal variation. We found that with using Eq. (1) for the fitting of real-life observations one achieves ~8% and ~18% higher correlation coefficients for the diurnal cycle of high- and low-level clouds, respectively, than with a simple harmonic function fitting. This justifies using Eq. (1) for the analysis. Searching a better fitting shape of the diurnal variation is out of the scope of this study, but the approach to estimate phase and amplitude of the diurnal variation, under the assumption of a known and fixed shape of the diurnal variation, remains valid for any periodic function (e. g. see the surface temperature variation fitting in Appendix B). Summarizing this section, the “sliding profile approach” allows to estimate the phase and amplitude of the diurnal variation from four measurements per day performed at arbitrary time with respect to peak time. The uncertainty of the estimated peak time for the combination of four AIRS and IASI monthly averages over  $1^\circ$  latitude  $\times$   $1^\circ$  longitude is  $\pm 1.5$ h while the diurnal cycle amplitude is retrieved/estimated with ~20% uncertainty.

### 3 Diurnal phase and amplitude of high clouds and their surrounding

#### 3.1. Zonal averages

We apply the diurnal cycle estimation algorithm to the amount of all high-level clouds and separately of high opaque, cirrus, and thin cirrus clouds/cloud amount from the CIRS-AIRS and CIRS-IASI cloud climatologies. For the following analyses we determined  $A_{24}$  and  $\varphi_{24}$  for each month and each  $1^\circ$  latitude  $\times$   $1^\circ$  longitude grid box, calculated  $A(t)$  in accordance with Eq. 1, and averaged the resulting shapes for a given latitude band or region.

To demonstrate the capabilities of the algorithm and the feasibility of the approach/our methodology, we first compare average diurnal variations of high-level cloud amount averaged over three latitudinal bands, separately for ocean and land, to those presented by Noel et al.(2018), determined using cloud properties retrieved from CATS (obtained from new lidar measurements of the Cloud-Aerosol Transport System) lidar measurements (CATS, Palm et al., 2016, Yorks et al., 2016) aboard the International Space Station (ISS). When looking at the comparisons, the reader should keep in mind that the latter dataset has a much smaller statistics, both temporal (, and to those from ISCCP presented by Rossow and Schiffer (1999). While lidar observations are more sensitive to thin cirrus than IR sounders, ISCCP is less sensitive to thin cirrus (e. g. Stubenrauch et al., February 2015 through October 2017 vs 8 2013). The much larger statistics of several years of global AIRS/IASI) and spatial (passive instruments scan the atmosphere in the direction perpendicular to the orbit to whereas active measurements provide a series- and ISCCP data compared to only nadir track statistics of measurements along the orbit). Fig. 3 presents the average three years of CATS leads to a smoother behaviour of the diurnal variation of high-level cloud amount over three latitudinal bands, separately over ocean and over land, during variations presented in Fig. 3 for boreal summer for CATS and during both boreal summer and boreal winter for AIRS / IASI. We explain smoother curves for AIRS IASI by larger statistics and the . The shape assumption in the diurnal cycle estimation. In- used for AIRS/IASI also contributes to a smoother behaviour and is well compensating for the better temporal resolution of ISCCP. All three datasets show larger diurnal cycle amplitudes over land than over ocean, in agreement with earlier many other studies, the diurnal cycle amplitudes

are smaller over the ocean than over land (e. g. Soden, 2000; Tian et al., 2004; Stubenrauch et al., 2006; Zhang et al. 2008). They are the largest in the tropics, and towards higher latitudes they are close to zero decrease in winter hemisphere (see also Fig. S1 for Southern hemisphere in the supplement), as shown for AIRS/IASI.

For each latitudinal band, the agreement between CATS and AIRS/IASI cloud Differences in the amplitudes between AIRS/IASI and CATS may be mostly explained by the small sampling of CATS, as only a few regions per latitude band are sampled each time. With increasing sampling towards higher latitudes (to be checked in the CATS paper), the agreement increases: over midlatitude land, both curves agree very well. ISCCP agrees in general also well with AIRS/IASI, in particular in the tropics and the subtropics, except during night where the high-level cloud amount is slightly underestimated by ISCCP due to misidentification of thin cirrus as midlevel cloud (Stubenrauch et al., 1999a). Over summer midlatitude land, the lower sensitivity of ISCCP to thin cirrus also leads to a slight diurnal eye amplitude underestimation and in addition to a slight phase shift (see also Fig. 4).

Concerning the phase, the agreement between AIRS/IASI and CATS and between AIRS/IASI and ISCCP is indicated in Fig. 3 by Pearson's linear correlation coefficient coefficients, together with the local peak times. The values are in general high, when the diurnal amplitudes are large, (above noise), which is the case in the summer hemisphere and tropics over land. For comparison, the amplitudes are much smaller in boreal winter. The peak local times (marked in red and blue) of AIRS/IASI and CATS do also agree to within 2 hours that is comparable to the estimated uncertainty range. We explain the difference between the diurnal cycle amplitudes shown in Fig. 3 by (i) differences in geographical coverage (AIRS/IASI combination provides daily snapshots of the whole globe, whereas CATS needs about a month to cover the same area) and (ii) differences in sensitivity to optically thin clouds.

Fig. 4 of 1.5 h. Concerning ISCCP, the local peak time in the tropics and subtropics has been systematically determined earlier, because of the slight underestimation of high-level cloud amount during night, while over summer midlatitude land the local peak time is estimated there hours later as by AIRS/IASI and CATS, because of missing thin cirrus during daytime. The latter are responsible for the local peak time at 17h LT, as seen in Fig. 4 which presents the contributions of the different cloud types (high opaque, cirrus and thin cirrus) to the total diurnal variation of high clouds for the same latitude bands as in Fig. 3, during boreal summer in the Northern hemisphere (Fig. S2 for austral summer in the Southern hemisphere). Both again, amplitudes are larger over land than over ocean, and in general the amplitudes and of the individual cloud types are larger than of all high-level clouds mixed together, as the phases of these cloud types differ. This helps to explain the differences between the diurnal peak times obtained from instruments with different sensitivity to thin cirrus. The diurnal cycle will be shifted in phase accordingly.

The distinction between the cloud types also allows a deeper interpretation of the diurnal cycle: cirrus which are the most abundant in the tropics have the largest amplitude in the diurnal cycle, with a minimum around 1PM and a maximum around 1AM over land. High opaque clouds have a maximum at 9PM which is several hours later than convective precipitation in the afternoon. This can be explained by the fact that high opaque clouds include part of the thicker anvil which develop afterwards. After 9PM cirrus anvils continue to develop. Over ocean convection often occurs in the early morning (e. g. Zipser et al., 2006;

Wall et al., 2018), which is followed by a high opaque cloud maximum around noon. Thin cirrus have a similar diurnal cycle over ocean and over land which lets assume that part of these thin cirrus are formed by in situ freezing. The diurnal cycle over tropical land, which is already largest for all high-level clouds together, as illustrated in Fig. 3, can be mainly understood as the diurnal cycle of deep convective cloud systems, with a peak of precipitation around 18h (Tian et al., 2004; Zhang et al. 2008), followed by high opaque cloud amount, including convective cores as well as part of thick anvil cirrus, with a peak around 21h and developing cirrus anvil amount with a maximum around 1h LT. The diurnal cycle of thin cirrus is smaller than the one of cirrus, because part of the thin cirrus corresponds to dissipating convective cloud systems and part to cirrus formed *in situ* by large-scale forcing (e. g. Luo and Rossow, 2004; Riihimaki et al., 2012). While the phase of cirrus and thin cirrus is lagged in the tropics, with a minimum of thin cirrus in the morning and a minimum of cirrus around 13h LT, their phase gets more similar towards higher latitudes. This can be probably explained by the fact that *in situ* freezing TTL cirrus do not exist at higher latitudes. In the midlatitudes cirrus and thin cirrus have a maximum in the afternoon and are most probably linked to synoptic situations of fronts. Some cirrus may be orographic, generated by ascent of air within large amplitude vertically propagating waves over mountains and even over hills (e. g. Queney, 1948; Ludlam, 1952). When comparing tropical land with tropical ocean, we observe a difference of about 11 hours for the high opaque clouds, with a broader maximum amount occurring in midmorning, again a few hours later than convection and precipitation of early morning (e. g. Tian et al., 2004; Zipser et al., 2006; Zhang et al., 2008). Cirrus and thin cirrus follow with maxima in the evening and during night. Their minima are again shifted, with the minimum of cirrus just before the maximum of high opaque clouds, as over land. The minimum of thin cirrus occurs in midmorning, similar to the minimum over land. The similar diurnal cycle of thin cirrus over ocean and over land is another indication that some of these thin cirrus are formed *in situ*, having no direct relation to the convective systems. The difference in phase of convection between ocean and land and the much broader peak of convection over ocean has been associated with differences in the vertical structure of land and ocean convection by Soden (2000). In contrary to land, over open ocean the thermal properties of the ocean surface undergo a relatively weak diurnal cycle. Chen and Houze (1997) have shown that the life-cycle of convective cloud systems also plays a role in affecting the diurnal cycle of cloudiness. The formation of longer lived oceanic convective cloud systems may introduce a bi-diurnal cycle, with large systems occurring at the same location only every other day.

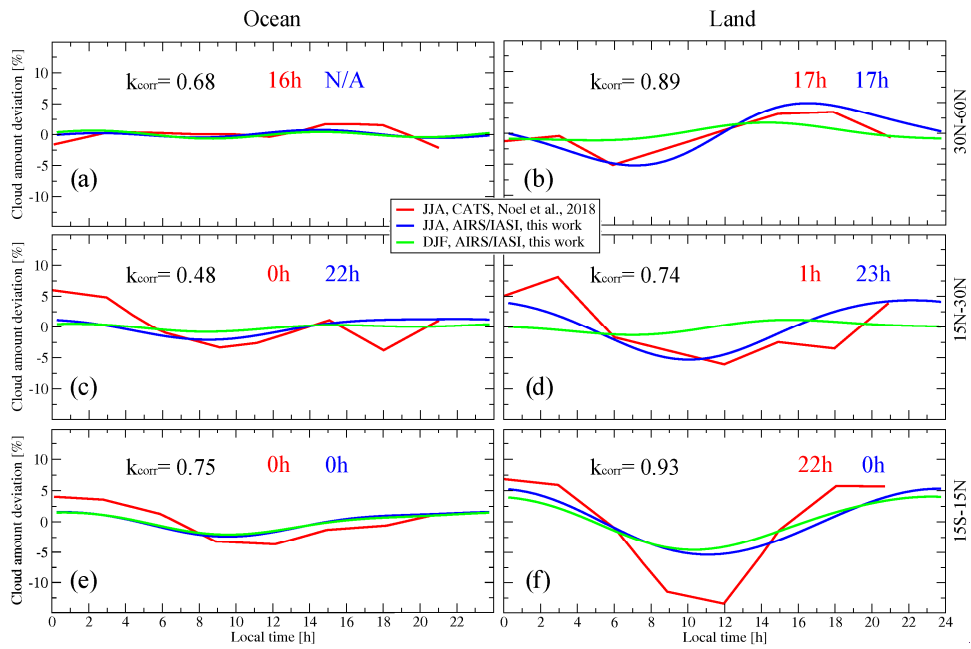

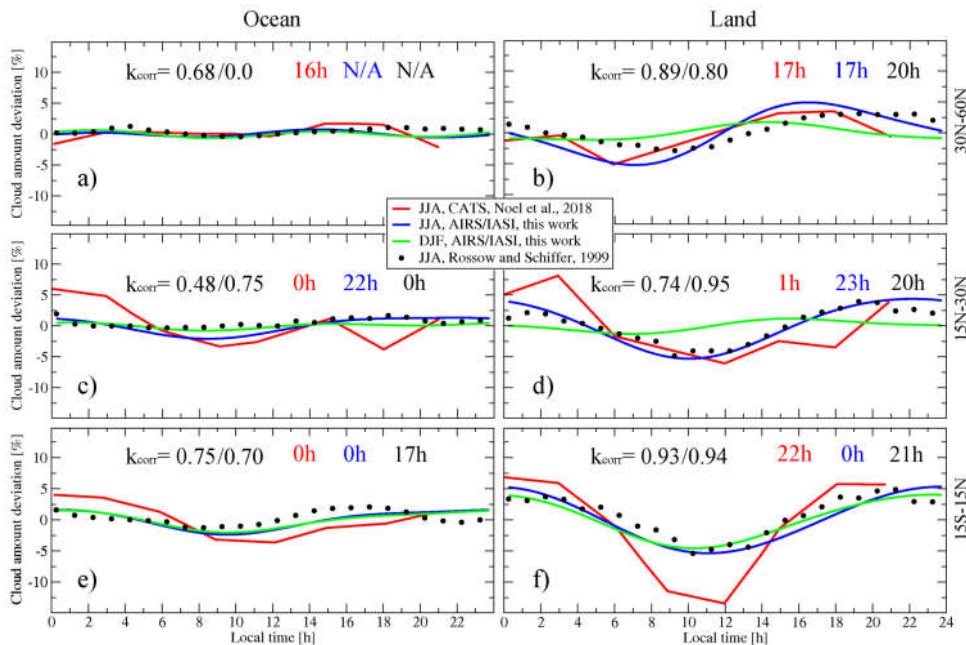

Fig. 3. Comparison of average diurnal cycles of high-level cloud amount over three latitudinal bands estimated from CATS lidar observations (Noel et al., 2018), from AIRS/IASI (this work), and from AIRS/IASI-ISCCP (Rossow and Schiffer, 1999). CATS statistics only includes June, July, and August (JJA, red curves) whereas AIRS/IASI results are shown both for boreal summer (JJA, blue curves) and boreal winter (December, January and February, DJF, green curves) in 2008–2015. The ISCCP JJA data cover the period of 1989–1991. The correlation coefficients between are given for AIRS/IASI and CATS and AIRS/IASI vs ISCCP sequences for JJA are marked in black the upper left part of each panel; the peak local times for CATS are marked in red, and for AIRS/IASI in blue, and for ISCCP in black in the upper right part of each panel. a) 30N–60N, ocean; b) 30N–60N, land; c) 15N–30N, ocean; d) 15N–30N, land; e) 15S–15N, ocean; f) 15S–15N, land.

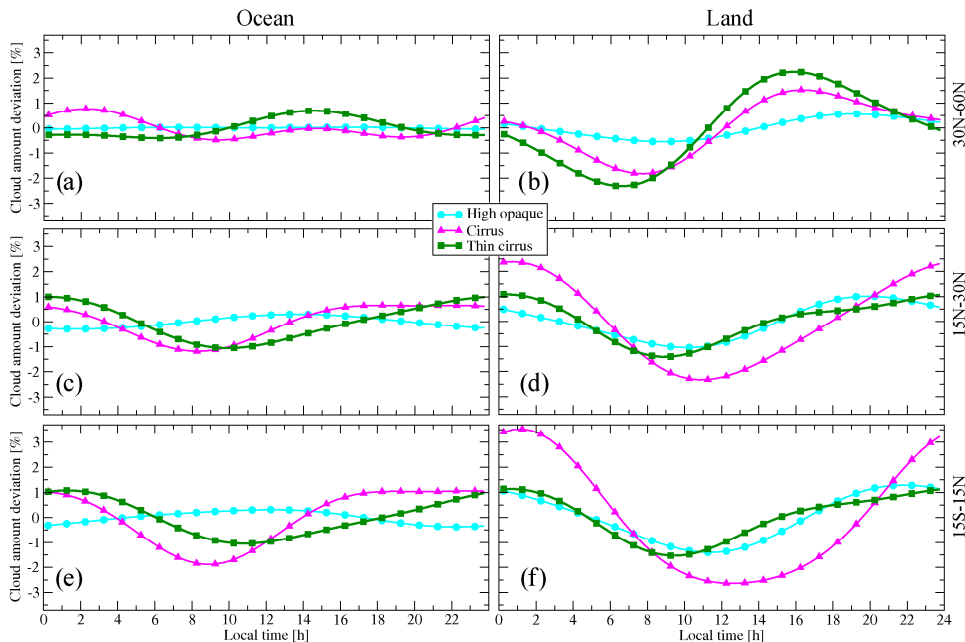

Fig. 4. Diurnal cycle of high opaque, cirrus, and thin cirrus amount in in NH midlatitudes, NH subtropics and tropics in boreal summer: a) 30N–60N, ocean; b) 30N–60N, land; c) 15N–30N, ocean; d) 15N–30N, land; e) 15S–15N, ocean; f) 15S–15N, land. The AIRS/IASI statistics is averaged for 2008–2015.

### 5 3.2. Geographical distributions

We first present geographical maps of phase and amplitude of the diurnal cycle of the high-level cloud types and then explore the links to their atmospheric environment. The latter includes surface temperature ( $T_{surf}$ ) and upper tropospheric (UT) relative humidity (RH), the parameters, which are both linked to their formation and then affected by the clouds.

We apply the [approach methodology](#) described in Section 2.2 to cloud [type amount](#) statistics gathered [at over](#) grid cells of  $1^\circ$  latitude  $\times$   $1^\circ$  longitude [for the period 2008 - 2015](#), separately for January and July. [To present the geographical distributions of Average](#) diurnal amplitude and phase, [we adopted the vector representation of diurnal amplitude and phase are represented by vectors as](#) suggested by Cairns (1995) and also utilized in (Soden, 2000; Tian et al., 2004), where the vector's length corresponds to the amplitude of the diurnal variation and the phase is converted to a local peak time, [represented by given as](#) the direction of the vector. Since different cloud types are characterized by different diurnal amplitudes, a unit vector is added to the lower right corner of each panel. We consider the diurnal cycle to be reliably detected at a given latitude/longitude, if

the Pearson's correlation coefficient for the corresponding time-series diurnal curves (see Section 2.2) is greater than 0.85, an empirical threshold based on examining numerous diurnal eye-plot variation curves.

Whenever we average the diurnal cycle parameters, we calculate the mean phase (or ~~the~~ peak time) using the corresponding amplitudes as weights. To avoid ~~the error~~ errors caused by averaging the phases in the vicinity of 24-0h transition (for example, direct averaging of 23h and 01h returns noon instead of midnight), we apply a "resulting force" algorithm (Appendix A).

Figures 5 to 7 and 6 present detected diurnal variations for the three different high-level clouds and relative humidity cloud type amounts, for January and July, respectively. A common feature of all these maps is that the amplitudes of the diurnal variations maximize over the tropical belt and in the summer hemisphere midlatitudes. This is an expected behaviour consistent with other observations (e. g. Wyley, Rossow and Schiffer, 1999; Wylie and Woolf, 2002; Tian et al., 2004; Hong et al., 2006; Stubenrauch et al., 2006). ~~Compared to the Figs. 5 and 6 of (Hong et al., 2006), the present peak times differ by 2 to 3 hours, but the direct comparison is hindered by the methodological (separating the clouds by of precipitation, of very cold cloud amount (IR brightness temperature selects only the coldest and relatively  $T_B^{IR} < 210$  K) and of cold cloud amount ( $T_B^{IR} < 235$  K) for different tropical regions, with lags between the three, corresponding to the development of deep convective systems. Compared to these results, our results are consistent when associating high opaque ones compared to using the emissivity thresholds) and by spatio-temporal averaging differences clouds with very cold clouds and cirrus with the warmer clouds.~~ Another expected feature is the magnitude of diurnal change over land being generally larger than that over ocean: ~~this can be explained by less strong convection (e. g. Tian et al., 2004; Zipser et al., 2006),~~ as the ocean surface temperature has a much smaller diurnal cycle (Fig. B1 in the Appendix B).

In general, the high opaque cloud amount with about 5% is much smaller than the cirrus and thin cirrus amount (Fig. 1). The clouds identified by the CIRS retrieval as high opaque ones, for which a diurnal variation is detected, have an average diurnal amplitude of about 5%, but certain regions (Fig. 6a, 7a) demonstrate amplitudes reaching 10%. The diurnal variation of cirrus clouds (Fig. 6b, 7b) is larger than that of high opaque clouds: the average amplitude is ~8%, with some regions reaching the values of 12% and individual grid cells showing amplitudes of up to 20%. It is interesting to note that over some regions, for which the diurnal cycle in high opaque clouds was not detected, cirrus clouds show a clear signature of the diurnal variation. This is explained by the much larger amount of the latter (Fig. 1). The relatively small amount of high opaque clouds (about 5%) provides a "noisier" input. On the other hand, large "blank" areas in the winter hemisphere with no detected diurnal variation assure us that the algorithm is stable against false triggering provoked by noise.

In general,  $T_{surf}$  over land is maximum between noon and 13h. 5a, 6a) demonstrate amplitudes reaching 10%. High opaque clouds, often associated with deep convective cores in the tropics, have a large regional variability, which may be influenced by orography. Convection Maximum high opaque cloud amount moves with the Intertropical Convergence Zone (ITCZ) towards the summer hemisphere, with peak times between 18h and midnight. In July, there is a large contrast between oceanic peak times around noon and continental ones in the evening around 20h, in the Asian monsoon regions and in the Caribbean, while in January the peak time over Indonesia is during night-continental opaque clouds and nearby oceanic regions. Over the continents, the peak typically often occurs in the evening around 20h as compared with oceanic areas near the continents with

peaks closer to noon. Nonetheless, in some other ocean locations opaque clouds also peak in the evening or overnight (e.g. tropical longitudes -115 to -135). The diurnal variation of cirrus clouds (Fig. 5b, 6b) is larger than that of high opaque clouds: the average amplitude is ~8%, with some regions reaching the values of 12% and individual grid cells showing amplitudes of up to 20%. There is less contrast between land and ocean for the cirrus and thin cirrus peak times: with continental peak times between midnight and 2h and oceanic ones around 18h. Over land, a lag of about 3 hours can be identified for two thirds of the cases (see also Section 3.3→). It seems to be more complicated to identify the lags over ocean, with a maximum of cirrus in the evening. Thin cirrus have a maximum at midnight over ocean, lagging behind cirrus, which can be interpreted as the thinning of convective systems during night. Over land the situation is a bit more complicated, with a maximum after noon in large mountain areas (Rocky Mountains, South America, Africa and Asia) and some lagging behind cirrus, again to be interpreted as thinning of convective systems. UT relative humidity, presented in Fig. 7, seems to be maximum in the convective regions just a few hours after the maximum of cirrus and thin cirrus, as observed by (Horvath and Soden, 2008).

While relatively small cloud amounts (like the one of high opaque clouds) or relatively cloud similar amounts during the day (like over ocean) provide a “noisier” input for the diurnal cycle estimation, large “blank” areas in the winter hemisphere with no detected diurnal variation assure us that the algorithm is stable against false triggering provoked by noise, and the diurnal cycle of cirrus clouds detected over the tropical ocean in July (Fig. 6b) is very close to that reported in (Soden, 2000) for their averaged June-August, 1987 (10%, 18h). This allows to say that larger ocean zones, which demonstrate a consistent diurnal cycle, deserve attention. However, the global maps have been established with one single detection threshold using Pearson’s correlation coefficient of 0.85, so if one wants to focus on specific ocean regions one might want to refine the threshold on the correlation coefficient.



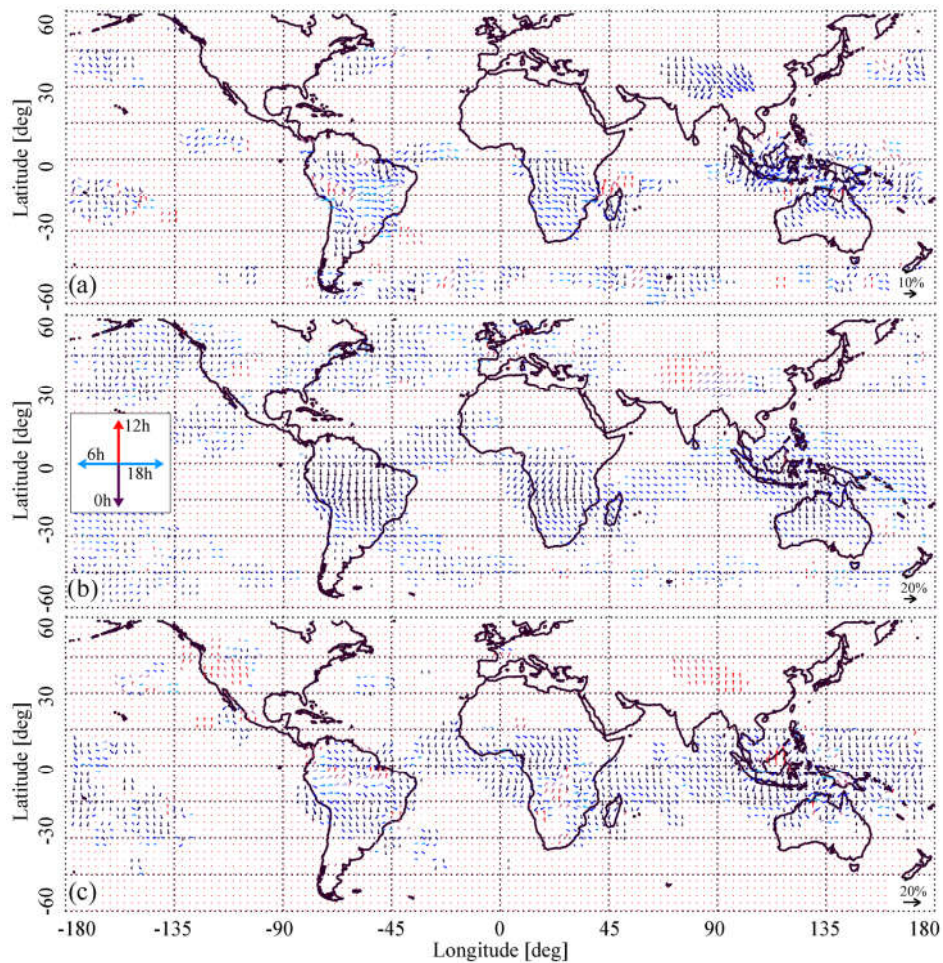

Fig. 5. Diurnal variation of (a) high opaque clouds, (b) cirrus clouds, and (c) thin cirrus clouds estimated from AIRS/IASI for January. Statistics is averaged over the period of 2008 to 2015. Vector length is proportional to the amplitude and its orientation defines the local time of the peak: downwards for 0h, left for 6h, upwards for 12h, and right for 18h. For the sake of readability, the arrows are also coloured in tints of red for day 6h-18h and in tints of blue for night 18h-6h.

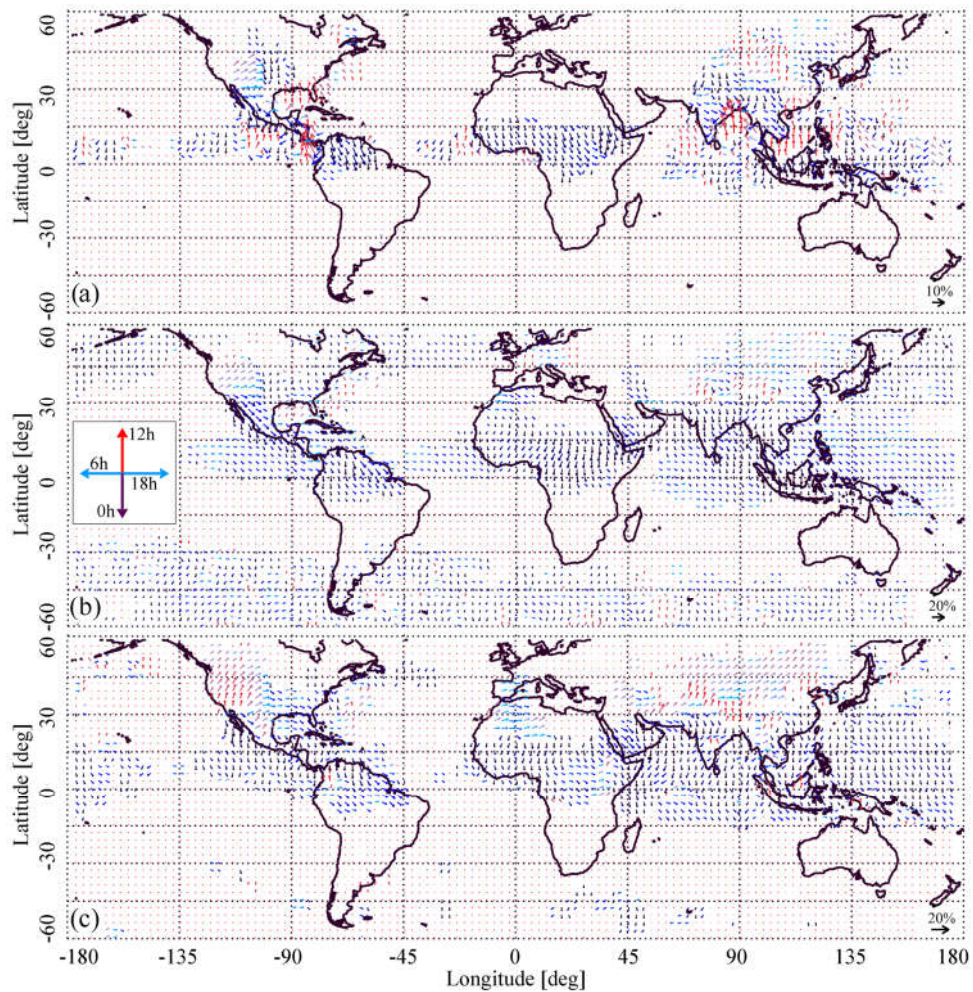

**Fig.6.** Diurnal variation of (a) high opaque clouds, (b) cirrus clouds, and (c) thin cirrus clouds estimated from AIRS/IASI for July. Statistics is averaged over 2008 to 2015. The vector representation is consistent with the caption of Fig.5. 6. Same as Fig. 5, but for averaged July (2008 through 2015).

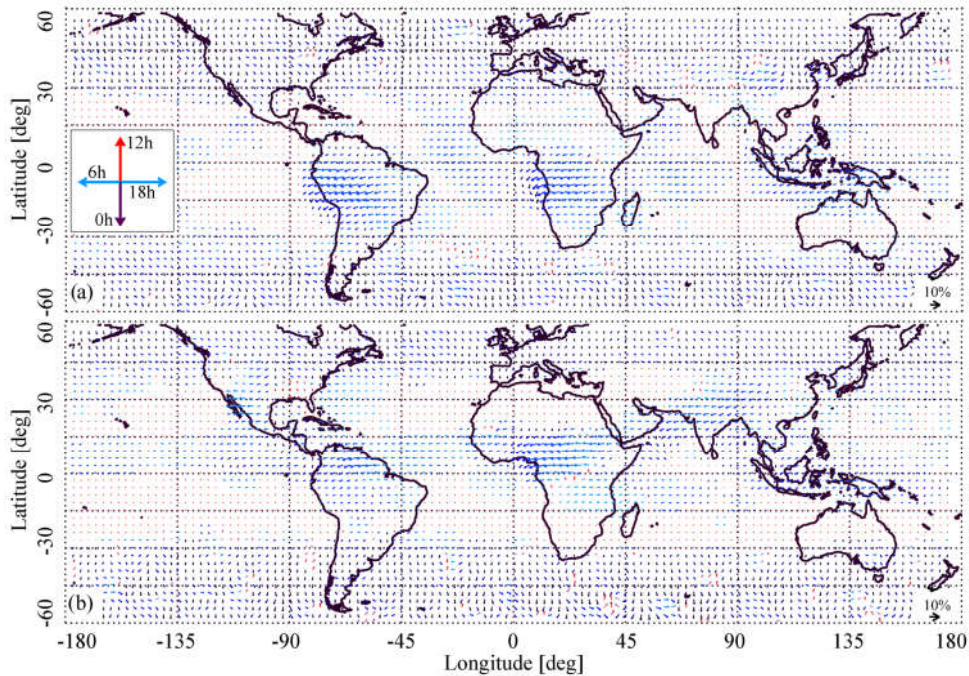

Fig.7. Diurnal variation of average relative humidity in a layer 150 hPa below the tropopause, estimated from ERA-Interim reanalyses, a) for January and b) for July. The vector representation is consistent with the caption of Fig.5. The tropopause level was determined in accordance with (Reichler et al., 2003).

### 5 3.3. Specific regions

Since different geographical regions are characterized by different cloud regimes (e. g. Rossow et al., 2002), we define seven regions over land, presented in Fig.8, which we analyse more in detail. Regions 1, 2, 3, 4, 5 and 6 are in the Northern midlatitudes and subtropics / tropics, while regions 2, 4, 5, 6 and 7 are in the Southern subtropics / tropics. The regional amplitudes and peak times of cloud type amount,  $T_{surf}$  and UT relative humidity are summarized in Tables 1 and 2 and illustrated in Fig.9 which presents circular histograms of the peak amplitude local times, separately for January and July.

From these tables we deduce that the two regions in the Northern midlatitudes (1 and 6) show a large difference in the  $T_{surf}$  amplitude, with a larger one in summer. The regions which are affected by the ITCZ (2, 4, 5 and 6) have a slightly larger  $T_{surf}$  amplitude in summer, while the two regions in the subtropics (3 and 7) show a large  $T_{surf}$  amplitude both in January and

Mis en forme : Police :Italique

in July. In general, a strong convective activity is revealed by a very large diurnal cycle in the occurrence of high opaque clouds (more than 10%). This is the case for regions 26 and 47 in January and for regions 43 and 54 in July.

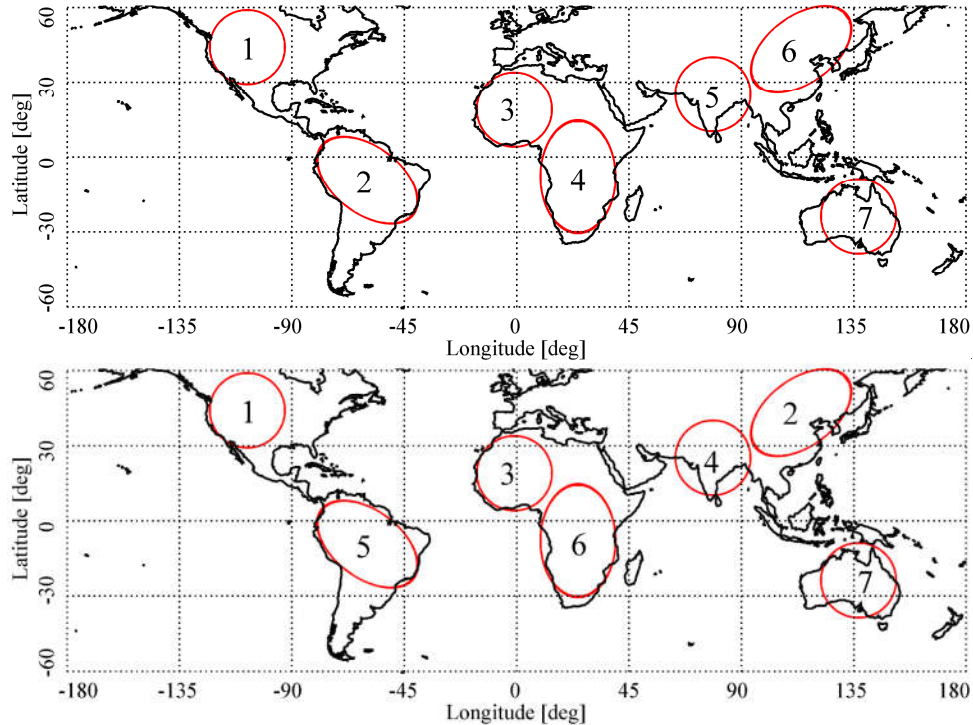

5 Fig.8. Regions selected for a more detailed analysis of the cloud diurnal cycle over land: 1—North America, 2—South America, 3—Northern Africa, 4—Indian continent, 5—South America, 6—South Africa, 7—Australia.

The two regions in the Northern midlatitudes (1 and 6) show a large diurnal cycle in  $T_{surf}$  in summer (about 10 K), leading to some convective activity (diurnal cycle of high opaque clouds of about 7% and 5%, respectively) in the afternoon. However, multiple peak amplitude local times may indicate effects of orography. The signals for cirrus and especially thin cirrus are more evident, with similar peak amplitudes and more concise peak amplitude local times in the early afternoon. The thin cirrus may be orographic cirrus. UT relative humidity has two peaks, one in the early morning (5h) and one in the afternoon (17h), in both cases the afternoon peak lagging shortly behind cirrus and thin cirrus and the early morning peak lagging behind high opaque clouds during night. During winter, the diurnal

Mis en forme : Police :Italique

10

$T_{surf}$  amplitude is much smaller (about 5 K), and no diurnal cycle could be detected in high opaque clouds. The diurnal cycle in UT relative humidity has opposite peaks, again at 5h and 17h. Over North America, cirrus has multiple peaks while thin cirrus has a peak around 13h and a smaller one in the morning (7h), while over North-East Asia there is one peak detected in cirrus around 14h. It is difficult to relate the UT humidity clearly to the cirrus during winter.

Mis en forme : Police :Italique

5 The two other regions in the Northern hemisphere are subtropical (3) and tropical (54). While the diurnal  $T_{surf}$  cycle is large both in January and in July (11 K) over North-West Africa, it is large (10 K) during the summer monsoon over the Indian subcontinent, while it is smaller (4 K) in January, when the ITCZ moves southwards. The diurnal behaviour of UT clouds is quite different between these regions, whereas the peak amplitude times in UT relative humidity are similar (17h in winter and 5h in summer). In the subtropics, in summer there seems to be some convective activity with a peak time in the evening (21h – 24h), followed by the development of cirrus and thin cirrus during night (2h), whereas in winter no diurnal cycle of high opaque clouds could be detected, and cirrus and especially thin cirrus have multiple peak times. The summer monsoon over the Indian subcontinent leads to a peak amplitude time of high opaque clouds in the early evening, indicating convective activity, followed by the development of cirrus anvils in the night and thin cirrus until noon. In January, the amplitude of the diurnal cycle of high opaque clouds is only half and later during night, while thin cirrus develop already in the morning, 15 thickening towards cirrus in the afternoon.

Mis en forme : Police :Italique

|                 |  | January    |       |       |    |      | July       |       |       |     |      |
|-----------------|--|------------|-------|-------|----|------|------------|-------|-------|-----|------|
| zone \ variable |  | $T_{surf}$ | Conv. | Thick | RH | Thin | $T_{surf}$ | Conv. | Thick | RH  | Thin |
| N. America      |  |            | N/D   |       |    |      |            |       |       |     |      |
| N.-E. Asia      |  |            | N/D   |       |    | N/D  |            |       |       |     |      |
| N.-W. Africa    |  |            | N/D   |       |    |      |            |       |       |     |      |
| Indian cont.    |  |            |       |       |    |      |            |       |       |     |      |
| S. America      |  |            |       |       |    |      |            |       |       |     |      |
| Africa          |  |            |       |       |    |      |            |       |       |     |      |
| Australia       |  |            |       |       |    |      |            | N/D   | N/D   | N/D | N/D  |

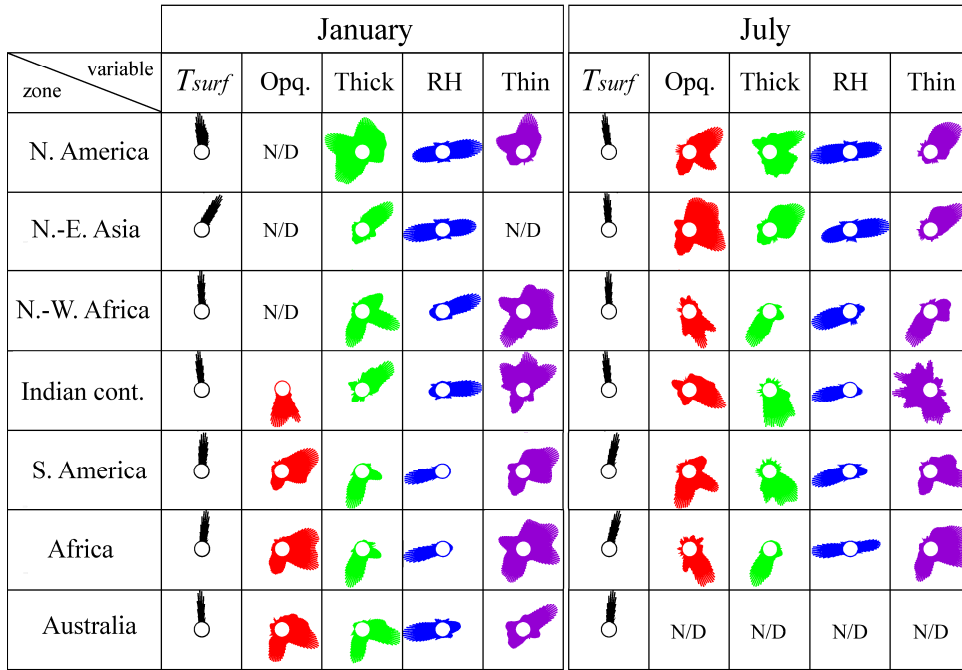

Fig.9. Circular histograms of local time of peak amplitude for  $T_{surf}$ , high opaque clouds, thick cirrus, relative humidity (RH), and thin cirrus for average January and July. The convention for vector direction representation is consistent with that described in the caption of Fig.6 while the amplitude is proportional to normalized histogram count number. "N/D" marks the cases, for which the diurnal cycle could not be reliably detected.

Comparing the tropical regions in the Southern hemisphere, South America has a slightly smaller diurnal amplitude of  $T_{surf}$  than the African region (5 K compared to 7 K), as the latter also includes subtropical land and the former is part of the 'Amazonian green ocean'. In summer (January), maximum convective activity in South America seems to be from 15h on, with cirrus and thin cirrus during night. Thin cirrus also has another peak amplitude in parallel with high opaque cloud between noon and 18h. Over Africa the diurnal behaviour is similar. In winter (July), the peak amplitude times of high opaque clouds are again later, with cirrus during night and again thin cirrus at multiple times.

For Australia, a diurnal cycle was only detectable in summer (January), with two peaks in high opaque clouds and in cirrus (19h and 1h) and a peak in thin cirrus in the early afternoon.

Mis en forme : Police :Italique

Table 1. Diurnal cycle amplitude and local time of the peak for  $T_{surf}$ , high opaque clouds, thick cirrus, thin cirrus, and relative humidity for average January. Long dash symbol (–) means that no reliable cycle was detected while a star symbol (\*) corresponds to multiple peaks in the circular histogram (see Fig. 9)

| Variable     | $T_{surf}$ |          | High opaque |          | Cirrus    |          | UT Relative humidity |          | Thin cirrus |          |
|--------------|------------|----------|-------------|----------|-----------|----------|----------------------|----------|-------------|----------|
|              | Ampl. [K]  | Peak [h] | Ampl. [%]   | Peak [h] | Ampl. [%] | Peak [h] | Ampl. [%]            | Peak [h] | Ampl. [%]   | Peak [h] |
| N. America   | 4.6        | 12.3     | –           | –        | 5.8       | 6-12     | 3.8                  | 5; 17    | 5.2         | 7–13     |
| N. E. Asia   | 6.3        | 14.0     | –           | –        | 7.4       | 15.1     | 3.3                  | 5; 17    | –           | –        |
| N. W. Africa | 11.0       | 12.3     | –           | –        | 5.9       | –        | 2.2                  | 16.4     | 5.2         | *        |
| Indian cont. | 9.7        | 12.0     | 5.7         | 22–2     | 5.3       | 15.2     | 1.8                  | 17.9     | 4.8         | 9–15     |
| S. America   | 4.9        | 12.5     | 7.5         | 16.1     | 12.8      | 23.3     | 5.2                  | 5.0      | 7.3         | 13–19    |
| Africa       | 6.9        | 12.7     | 7.9         | 17-22    | 12.2      | 1.3      | 4.4                  | 4.8      | 7.8         | *        |
| Australia    | 11.3       | 12.1     | 7.5         | 20.3     | 8.2       | 19; 1    | 2.0                  | 5.5      | 6.2         | 15.5     |

Table 2. Same as Table 1, but for average July.

| Variable     | $T_{surf}$ |          | High opaque |          | Cirrus    |          | UT Relative humidity |          | Thin cirrus |          |
|--------------|------------|----------|-------------|----------|-----------|----------|----------------------|----------|-------------|----------|
|              | Ampl. [K]  | Peak [h] | Ampl. [%]   | Peak [h] | Ampl. [%] | Peak [h] | Ampl. [%]            | Peak [h] | Ampl. [%]   | Peak [h] |
| N. America   | 10.5       | 11.8     | 7.2         | 14-2     | 7.7       | 16-24    | 2.9                  | 5; 17    | 7.5         | 14.8     |
| N. E. Asia   | 8.3        | 12.0     | 5.2         | *        | 6.8       | 15.7     | 2.8                  | 5; 17    | 6.4         | 15.9     |
| N. W. Africa | 11.0       | 12.5     | 6.9         | 22.7     | 8.1       | 1.4      | 2.7                  | 4.9      | 7.3         | 2.3      |
| Indian cont. | 4.3        | 11.9     | 8.3         | 19.5     | 11.7      | 22.7     | 4                    | 5.3      | 8.0         | *        |
| S. America   | 5.6        | 13.2     | 8.1         | 1.0      | 8.8       | 21.2     | 2.9                  | 5.1      | 6.3         | 18.9     |
| Africa       | 7.8        | 13.4     | 7.7         | 22.1     | 11.2      | 1.2      | 3.5                  | 5; 17    | 7.0         | *        |
| Australia    | 8.5        | 12.6     | –           | –        | –         | –        | 1.5                  | 5; 17    | –           | –        |

5

For Australia, a diurnal cycle was only detectable in summer (January), with two peaks in high opaque clouds and in cirrus (19h and 1h) and a peak in thin cirrus in the early afternoon.

In general, UT relative humidity has a peak in the early morning for regions of convection, which may be explained by UT humidification from the dissipation of the anvils (e. g. Horvath and Soden, 2008). In winter, there seems to be a peak in UT relative humidity in the afternoon, often also just after the appearance of thin cirrus, which this time seems to be formed by *in situ*-freezing, and not being offspring of a convective system.

10

Mis en forme : Police :italique



For the regions where diurnal variation was reliably detected both for high opaque clouds and for cirrus, the diurnal cycle amplitudes of these two cloud types are correlated with  $k_{cor}=0.75$ . This can be probably assigned to being part of the same cloud system. Even though peak times for cirrus clouds and for high opaque clouds vary almost in the same limits as those of high opaque clouds ~~do range~~, an average lag of  $\sim 3$  h can be identified for two thirds of the cases. We have to note that in certain cases the definition of the lag becomes ambiguous due to possible 24 h phase shift, which is not detectable in our approach. For example, the 15 h peak in January histogram for thick clouds over South Asia (Fig. 9) can be caused both by *in situ* formation of high clouds 4 hours after the peak of local insolation and by an outflow of the high opaque column with a characteristic time of  $\sim 16$  h (the lag between high opaque and cirrus cloud peaks).

Another presumable element of the cloud system lifecycle is the dissipation of the anvil. This can be manifested both in the RH change (Fig. 8 7) and in thin cirrus variation (Fig. 5c, 6c, 7e). The peak time of RH “release” from the cloud oscillates between late afternoon and early morning maxima (Kottayil et al., 2016) and its lag with respect to cirrus can be estimated as  $\sim 3.5$  h. Finally, thin cirrus show good coupling with high opaque clouds and the cirrus, and the amplitudes of their diurnal cycle are comparable with those of the cirrus. The peak times for these clouds have broad distributions that makes it difficult to estimate the lags. We assign this to long characteristic times of anvil dissipation and to mixing the effects of *in situ* and convective outflow cloud formation mechanisms: air parcels saturated with water vapour released in the process of anvil dissipation may travel to other areas and form clouds there. For the cases when the peak time distribution is narrow, the average lag with respect to anvil can be estimated as  $\sim 10$  h, but the individual values vary from almost zero to 20 h.

These lags and correlations indicate that the convective cloud life cycle might be described as follows: (a) the convective cloud peak time precedes the cirrus anvil formation; (b) the cirrus anvil dissipates, releasing water vapour and turning to thin cirrus; (c) both the cirrus anvil and thin cirrus are strongly coupled with the high opaque core; (d) relative humidity is strongly coupled with the cirrus-, lagging behind which may be associated with upper tropospheric humidification by cirrus outflow.

#### **43.4. Relating diurnal amplitudes to climate fluctuations**

As the period of eight years of combined AIRS and IASI observations is too short to directly study long-term variability of diurnal phases of the different cloud type amounts, we present in this section geographical patterns of diurnal amplitude variability in relation to climate variability, given by de-seasonalized monthly mean global surface temperature,  $T_{surf}$ , anomalies. Within this short time period, changes in global  $T_{surf}$  (or tropical, as both are strongly correlated) reflect the El Niño Southern Oscillation (ENSO). ENSO is the most dominant mode of interannual variability in the Earth’s climate system, and has been often used to study cloud feedbacks (e. g. Lloyd et al., 2012; Liu et al., 2017; Stephens et al., 2018). In general, a positive global  $T_{surf}$  anomaly corresponds to El Niño, with maximum convection over the Central Pacific and a negative  $T_{surf}$  anomaly to La Niña, with maximum convection over the West Pacific. Stubenrauch et al. (2017) have shown with 15 years of AIRS-CIRS cloud data that changes in relative amount of tropical high opaque and thin cirrus with respect to increasing global mean  $T_{surf}$  have different geographical patterns (see their Fig. 12): while the high opaque clouds, often linked to strong

precipitation (Protopapadaki et al., 2017), relative to all clouds, increase in a narrow band in the tropics, there is a large increase in relative thin cirrus amount around these regions.

By applying the same technique, namely by determining a change in diurnal amplitude of cloud type amount as a function of change in global mean  $T_{surf}$  by a linear regression of their monthly time anomalies, at a spatial resolution of 1°latitude x 1°longitude, we have obtained the spatial patterns presented in Fig. 10. Indeed, we observe also an ENSO pattern for the change in diurnal amplitude, with an increasing amplitude in regions of deep convection (the band near the equator, in the Central Pacific for El Niño and for the West Pacific and South America for La Niña). The strongest changes are observed for high opaque and cirrus cloud amount, but one can distinguish them also for the thin cirrus which seem to be directly linked to convective cloud systems. Considering the relative errors of the determined slopes, presented also as geographical maps in the supplement (Fig. S3), though in general quite noisy, we see nevertheless that the strongest signal over the Central Pacific has the smallest error (of about 30%). With this analysis we have shown yet in another way that high-level clouds linked to deep convective systems have the largest diurnal amplitudes. To study the change in phase is more delicate, already due to possible misinterpretation of peak amplitude around midnight and also as other factors such as winds may play a role.

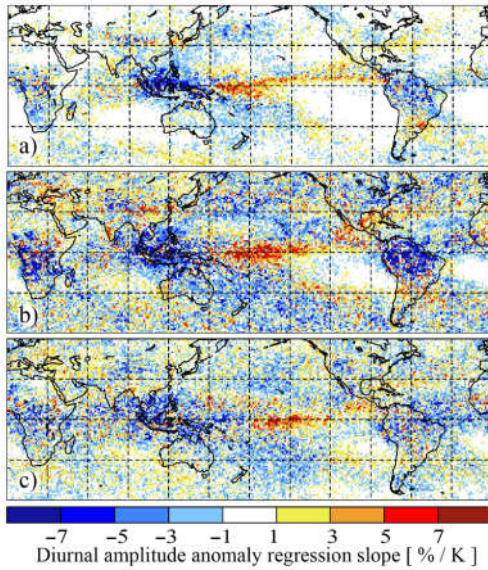

15 **Fig. 10.** Geographical maps of linear regression slopes for the period of 2008–2015 estimated from the ratio of de-seasonalized monthly mean diurnal amplitude anomalies determined from combined AIRS-CIRS and IASI-CIRS cloud data, and global mean  $T_{surf}$  anomalies, from ERA-Interim for (a) high opaque cloud amount, (b) cirrus, and (c) thin cirrus.

#### 4. Conclusions

Multi-spectral infrared sounders are advantageous for the retrieval of the high-level cloud properties. Their good spectral resolution allows a reliable cirrus identification down to an IR optical depth of 0.1, day and night. However, these instruments are mostly ~~onboard~~aboard polar orbiting satellites, providing only observations twice per day. In this article, we ~~presented a methodology to use~~ the synergy of AIRS and IASI cloud observations, ~~allowing~~ to address the diurnal variation not only of total high-level cloud cover, and amount, but also separately for high opaque, cirrus, and thin cirrus clouds. Based on previous studies (Stubenrauch et al., 2017), we needed to implement the same set of surface and atmospheric ancillary data (from meteorological reanalysis ERA-Interim) to extract a reliable diurnal cycle from the measurements~~cloud retrievals~~ performed ~~by~~on different satellite ~~instruments~~instrument measurements. We demonstrated the feasibility ~~of determining~~to determine the diurnal cycle amplitude and phase from just four measurements per day using the “sliding profile approach”, which is based on the correlation of a measured variation with an assumed shape of the diurnal cycle. For the combination of AIRS and IASI, this approach allows estimating the diurnal variation phase with an accuracy of  $\pm 1.5$ h while the amplitude is determined with  $\sim 20\%$  accuracy. ~~The zonally averaged diurnal cycle of high-level clouds retrieved from AIRS and IASI measurements compares relatively well with the one determined from CATS lidar observations, the latter of more limited statistics. Linear correlation coefficients reach 0.9 over land and 0.75 over ocean and the amplitudes are of the same order of magnitude. It is interesting to note that the local time of the minimum moves from the summer hemisphere midlatitudes towards the tropics from 6h to noon and the one of the maximum from 17h to 1h. This means that the A-Train orbit captures the minimum and maximum cloud cover over tropical land.~~

~~Geographical maps of detected~~The zonally averaged diurnal variation cycle of high-level cloud amount estimated from AIRS and IASI cloud data compares relatively well with other datasets, such as the one determined from CATS lidar observations and the one from ISCCP multispectral imager observations. Slight differences can be understood by much more limited statistics of CATS, in particular in the tropics, and misidentification of thin cirrus by ISCCP.

~~Considering diurnal variations separately for high opaque, cirrus and thin cirrus often show a different behaviour, which indicates the importance amount leads to distinguish these~~ better understanding, as one can also study the lags between the different cloud types, which also as they have different radiative effects. In general the amplitude of the diurnal cycle is larger over land than over ocean and largest in the tropics, followed by summer midlatitudes, in agreement with other analyses. By using the time series of the eight years of combined AIRS-CIRS and IASI-CIRS data, we could relate diurnal amplitude changes to climate fluctuations, given by de-seasonalized global  $T_{surf}$  anomalies from ERA-Interim, and found that largest diurnal amplitudes of high-level cloud amount are linked to deep convective systems.

A more detailed analysis of specific regions over land has shown that the largest diurnal cycle seems to prevail during summer monsoon over the Indian subcontinent with 8.3% for high opaque clouds, 11.7% for cirrus, and 8.0% for thin cirrus clouds. The local peak times vary with cloud type, season, and location, ~~but in general AIRS alone with its observations at 1h30 and 13h30 LT is closer to capturing the maximum and minimum of cloud cover over tropical land than IASI observing the~~

Mis en forme : Espace Après : 0 pt

[atmosphere at 9h30 and 21h30 LT](#). Lags and correlation coefficients between high opaque, cirrus, thin cirrus and UT relative humidity indicate a life cycle of continental tropical convective systems as: (a)-the convective cloud peak time precedes the cirrus anvil formation; (b) the cirrus anvil dissipates, releasing water vapour and turning to thin cirrus; (c) both the cirrus anvils and thin cirrus are strongly coupled with the high opaque core.

## 5 Author contribution

Artem Feofilov performed the cloud property retrievals from AIRS and IASI observations, developed the methodology of diurnal variation retrieval from the combination of two infrared sounders, and analysed the data. Claudia Stubenrauch compared the retrieved diurnal variations with those retrieved from CATS lidar, performed the zonal analysis and established the links between the cloud system elements.

## 10 Acknowledgements and Data

This research was supported by ESRIN (Contract No.: 4000101773/10/I-LG) within the framework of ESA Climate Change Initiative (ESA CCI), Phase I and by CNRS. The monthly database of detected diurnal cycle amplitude and phase for UT clouds (high opaque, cirrus and thin cirrus), at a spatial resolution of 1° latitude x 1° longitude, from the AIRS-IASI synergy will be distributed by the French Data Centre AERIS.

15

### Appendix A: Resulting force algorithm

To avoid error caused by averaging the phases in the vicinity of 24-0h transition (for example, direct averaging of 23h and 01h returns noon instead of midnight), we apply a “resulting force” algorithm, which is resembling the calculation of the tilt of a disk with masses on its edges (Fig.-A1): the positions of the “masses” on the disk’s perimeter correspond to phase values while the masses themselves are proportional to the amplitudes. When everything is set up and the disk is “released”, the direction of the tilt defines the average phase (arrow in Fig.-A1b).

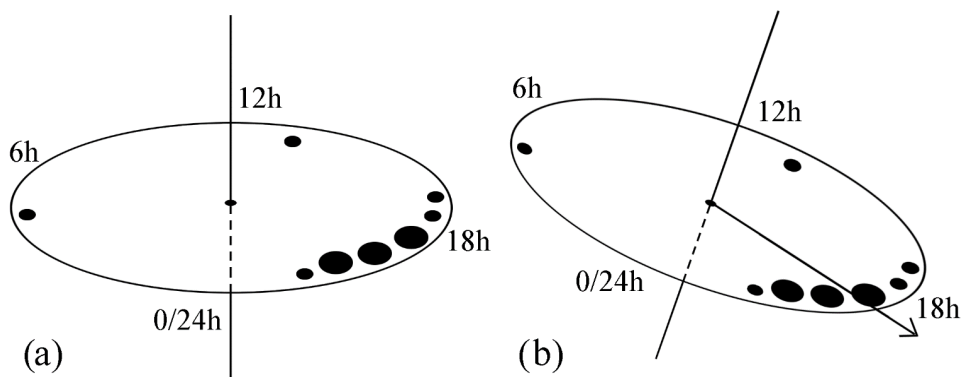

Fig.-A1. Illustration of “resulting force” algorithm for calculating the average of phase values: a) diurnal cycle amplitudes are used as “weights” (black dots of different sizes), which are placed on the perimeter of the disk in accordance with the corresponding phase values; b) when “released”, the disk tilts in the direction of the most frequent phases with the strongest amplitudes.

## Appendix B: Diurnal variation of surface temperature

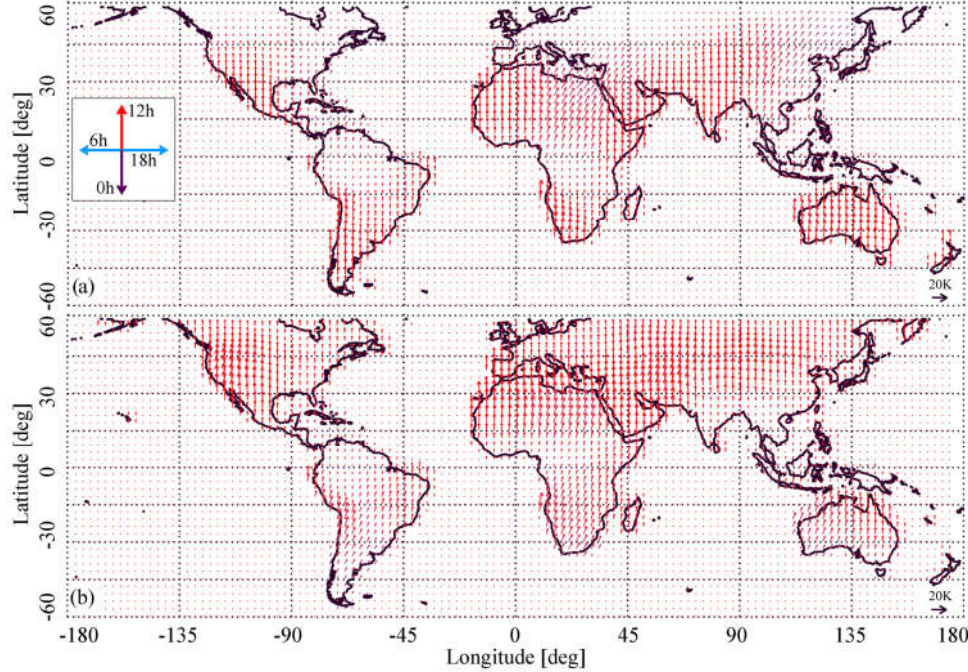

Fig.-B1. Diurnal variation of surface temperatures, estimated from ERA-Interim reanalyses, in January (top) and in July (bottom). The vector representation is consistent with the caption of Fig. 5.

- 5 We searched the parameters of diurnal variation of surface temperature using the shape provided by (Aires et al., 2004), which we approximate as follows:

$$A(t) = 0.95 \cdot \left[ \frac{1}{t^2 + 15} + e^{-0.08 \cdot (t - 13.2)^2} + 0.04 \cdot t \right] \quad (\text{B.1})$$

where the amplitude  $A(t)$  is in [K] and time  $t$  is in [h] and the coefficients come from the best fit approximation. As one can see (Fig.-B1 and Tables 1 and 2), the amplitude of  $T_{surf}$  variation over land is large in tropical areas and in the summer hemisphere, reaching 20 K in the deserts (the doubled amplitude corresponds to  $\max(T_{surf}) - \min(T_{surf})$  temperature span) while the variation over ocean is mostly negligible. The absolute values of the  $T_{surf}$  variation agree with those reported in (Goetsche and Olesen, 2001; Pinker et al., 2007; Duan et al., 2014; Holmes et al., 2015; Ruzmaikin et al., 2017). The spreading of the diurnal cycle from coastal regions out to surrounding oceans has been noted already in (Yang and Slingo,

10

2000) who suggested a complex land-sea-breeze effects as an explanation. The local time of the peak is quite stable in all areas where the diurnal cycle was detected, both in January and July, and we estimate the interannual variability for the  $T_{surf}$  peak time for each zone to be  $\sim 0.5$  h. Depending on the geographical area,  $T_{surf}$  peak time changes within 11.8–14.0h limits, and possible mechanisms of the lag with respect to peak of solar insolation are discussed in (Ait-Mesbach et al.2015).

- 5 According to their simulations, the soil thermal inertia “impacts directly the amplitude of  $T_{surf}$  variation with lower thermal inertia inducing higher amplitude (and vice versa)”. Their study shows that thermal inertia also impacts the turbulent heat fluxes.

## References

- 10 Aires, F., Prigent, C., and Rossow, W. B.: Temporal interpolation of global surface skin temperature diurnal cycle over land under clear and cloudy conditions, *J. Geophys. Res.*, 109, D04313, <https://doi.org/10.1019/2003JD003527>, 2004.
- Ait-Mesbah, S., Dufresne, J. L., Cheruy, F., and Hourdin, F.: The role of thermal inertia in the representation of mean and diurnal range of surface temperature in semiarid and arid regions, *Geophys. Res. Lett.*, 42, 7572–7580, doi:10.1002/2015gl065553, 2015.
- Bowman, K. P., Collier, J. C., North, G. R., Wu, Q., Ha, E., and Hardin, J.: Diurnal cycle of tropical precipitation in Tropical Rainfall Measuring Mission (TRMM) satellite and ocean buoy rain gauge data, *J. Geophys. Res.*, 110, D21104, doi:10.1029/2005JD005763, 2005.
- 15 Cairns, B.: Diurnal variations of cloud from ISCCP data. *Atmos. Res.*, 37, 133-146, doi:10.1016/0169-8095(94)00074-N, 1995.
- ~~Cetrone, J. and Houze, R. A.: Anvil clouds of tropical mesoscale convective systems in monsoon regions. *Q. J. R. Meteorol. Soc.*, 135, 305–317. doi:10.1002/qj.389, 2009.~~
- 20 Chahine, M. T., Pagano, T. S., Aumann, H. H., Atlas, R., Barnet, C., Blaisdell, J., Chen, L., Divakarla, M., Fetzer, E. J., Goldberg, M., Gautier, C., Granger, S., Hannon, S., Irion, F. W., Kakar, R., Kalnay, E., Lambrigtsen, B. H., Lee, S., Le Marshall, J., McMillan, W. W., McMillin, L., Olsen, E. T., Revercomb, H., Rosenkranz, P., Smith, W. L., Staelin, D., Strow, L. L., Susskind, J., Tobin, D., Wolf, W., and Zhou, L.: AIRS: Improving weather forecasting and providing new data on greenhouse gases, *B. Am. Meteorol. Soc.*, 87, 911–926, doi:10.1175/BAMS-87-7-911, 2006.
- 25 ~~Chen, S. S., and R. A. Houze Jr, Diurnal variation and life-cycle of deep convective systems over the tropical Pacific warm pool. *Q. J. R. Meteorol. Soc.*, 123, 357-388, 1997.~~
- Dee, D. P., Uppala, S. M., Simmons, A. J., Berrisford, P., Poli, P., Kobayashi, S., Andrae, U., Balmaseda, M. A., Balsamo, G., Bauer, P., Bechtold, P., Beljaars, A. C. M., van de Berg, L., Bidlot, J., Bormann, N., Delsol, C., Dragani, R., Fuentes, M., Geer, A. J., Haimberger, L., Healy, S. B., Hersbach, H., Hólm, E. V., Isaksen, I., Kållberg, P., Köhler, M., Matricardi, M., McNally, A. P., Monge-Sanz, B. M., Morcrette, J.-J., Park, B.-K., Peubey, C., de Rosnay, P., Tavolato, C., Thépaut, J.-N. and

- Vitart, F.: The ERA-Interim reanalysis: configuration and performance of the data assimilation system. *Q. J. R. Meteorol. Soc.*, 137, 553–597, doi: [10.1002/qj.828](https://doi.org/10.1002/qj.828), 2011.
- Duan, S.-B., Li, Z.-L., Tang, B.-H., Wu, H., Tang, R., Bi, Y., Zhou, G.: Estimation of diurnal cycle of land surface temperature at high temporal and spatial resolution from clear-sky MODIS Data. *Remote Sensing*, 6(4), 3247–3262, doi: [10.3390/rs6043247](https://doi.org/10.3390/rs6043247), 2014.
- 5 Eastman, R. and Warren, S. G.: Diurnal cycles of cumulus, cumulonimbus, stratus, stratocumulus, and fog from surface observations over land and ocean, *J. Climate*, 27, 2386–2404, <https://doi.org/10.1175/JCLI-D-13-00352.1>, 2014.
- Feofilov, A. G., Stubenrauch, C. J., and Delanoë, J.: Ice water content vertical profiles of high level clouds: classification and impact on radiative fluxes, *Atmos. Chem. Phys.*, 15, 12327–12344, <https://doi.org/10.5194/acp-15-12327-2015>, 2015.
- 10 Feofilov, A. and Stubenrauch, C.: LMD Cloud Retrieval using IR sounders. Algorithm Theoretical Basis, CIRS-LMD software package V2, 19 pp., <https://doi.org/10.13140/RG.2.2.15812.63361>, 2017.
- Goldberg, R.A., Feofilov, A.G., Pesnell, W.D., and Kutepov, A.A.: Inter-hemispheric Coupling during Northern Polar Summer Periods of 2002-2010 using TIMED/SABER Measurements, *J. Atm. Solar-Terr. Phys.*, 104, 277–284, doi: [10.1016/j.jastp.2012.11.018](https://doi.org/10.1016/j.jastp.2012.11.018) (2013).
- 15 Göttsche, F.-M., and Olesen, F. S.: Modelling of diurnal cycles of brightness temperature extracted from METEOSAT data. *Remote Sens. of Env.*, 76(3), 337–348, doi: [10.1016/S0034-4257\(00\)00214-5](https://doi.org/10.1016/S0034-4257(00)00214-5), 2001.
- Hilton, F., Armante, R., August, T., Barnett, C., Bouchard, A., Camy-Peyret, C., Capelle, V., Clarisse, L., Clerbaux, C., Coheur, P., Collard, A., Crevoisier, C., Dufour, G., Edwards, D., Fajjan, F., Fourrié, N., Gambacorta, A., Goldberg, M., Guidard, V., Hurtmans, D., Illingworth, S., Jacquinet-Husson, N., Kerzenmacher, T., Klaes, D., Lavanant, L., Masiello, G., Matricardi, M.,
- 20 McNally, A., Newman, S., Pavelin, E., Payan, S., Péquignot, E., Peyridieu, S., Phulpin, T., Remedios, J., Schlüssel, P., Serio, C., Strow, L., Stubenrauch, C., Taylor, J., Tobin, D., Wolf, W., and Zhou, D.: Hyperspectral Earth Observation from IASI: Five Years of Accomplishments. *Bull. Amer. Meteor. Soc.*, 93, 347–370, <https://doi.org/10.1175/BAMS-D-11-00027.1>, 2012.
- Holmes, T. R. H., Crow, W. T., Hain, C., Anderson, M. C., Kustas, W. P.: Diurnal temperature cycle as observed by thermal infrared and microwave radiometers, *Remote Sens. of Env.*, 158, 110–125, doi: [10.1016/j.rse.2014.10.031](https://doi.org/10.1016/j.rse.2014.10.031), 2015.
- 25 Hong, G., Heygster, G., and Rodriguez, C. A. M.: Effect of cirrus clouds on the diurnal cycle of tropical deep convective clouds, *J. Geophys. Res.*, 111, D06209, doi: [10.1029/2005JD006208](https://doi.org/10.1029/2005JD006208), 2006.
- Horvath, A., and Soden, B., Lagrangian Diagnostics of Tropical Deep Convection and its Effect upon Upper-Tropospheric Humidity, *J. Climate*, 21, 1013–1028, doi: [10.1175/2007JCL1786.1](https://doi.org/10.1175/2007JCL1786.1), 2008.
- 30 Kottayil, A., John, V. O., Buehler, S. A., Mohanakumar, K.: Evaluating the Diurnal Cycle of Upper Tropospheric Humidity in Two Different Climate Models Using Satellite Observations. *Remote Sensing*, 8(4), 325–338, doi: [10.3390/rs8040325](https://doi.org/10.3390/rs8040325), 2016.



- Liu, R., Liou, K.-N., Su, H., Gu, Y., Zhao, B., Jiang, J. H., and Liu, S. C.: High cloud variations with surface temperature from 2002 to 2015: Contributions to atmospheric radiative cooling rate and precipitation changes. *J. Geophys. Res.: Atmospheres*, 122, 5457–5471, doi: 10.1002/2016JD026303, 2017.
- Lloyd, J., Guilyardi, E., and Weller, H.: The Role of Atmosphere Feedbacks during ENSO in the CMIP3 Models. Part III: The Shortwave Flux Feedback. *J. Climate*, 25, 4275–4293, doi: 10.1175/JCLI-D-11-00178.1, 2012.
- Ludlam, F. H.: Orographic cirrus clouds. *Q. J. R. Meteorol. Soc.*, 78, 552–562, doi: 10.1002/qj.49707833806, 1952.
- Luo, Z., and Rossow, W.B.: Characterizing tropical cirrus life cycle, evolution, and interaction with upper-tropospheric water vapor using Lagrangian trajectory analysis of satellite observations. *J. Climate*, 17, 4541–4563, doi: 10.1175/3222.1, 2004.
- Menzel, W. P., Frey, R. A., Borbas, E. E., Baum, B. A., Cureton, G., and Bearson, N.: Reprocessing of HIRS Satellite Measurements from 1980 to 2015: Development towards a consistent decadal cloud record, *Journal of Applied Meteorology and Climatology*, 55, 2397–2410, doi: 10.1175/JAMC-D-16-0129.1, 2016.
- Noel, V., Chepfer, H., Chiriaco, M., and Yorks, J.: The diurnal cycle of cloud profiles over land and ocean between 51° S and 51° N, seen by the CATS spaceborne lidar from the International Space Station, *Atmos. Chem. Phys.*, 18, 9457–9473, doi: 10.5194/acp-18-9457-2018, 2018.
- Palm, S. P., Hlavka, D. L., Selmer, P., Pauly, R.: the Cloud Aerosol Transport System (CATS) Data Product Catalog release 3.0. Retrieved on February 16th 2019 from [https://cats.gsfc.nasa.gov/media/docs/CATS\\_Data\\_Products\\_Catalog\\_Pdf](https://cats.gsfc.nasa.gov/media/docs/CATS_Data_Products_Catalog_Pdf), 2016
- Pinker, R. T., Sun, D., Miller, M., and Robinson, G. J.: Diurnal cycle of land surface temperature in a desert encroachment zone as observed from satellites, *Geophys. Res. Lett.*, 34, L11809, doi: 10.1029/2007GL030186, 2007.
- Protospadaki, S. E., Stubenrauch, C. J., and Feofilov, A.G.: Upper Tropospheric Cloud Systems Derived from IR Sounders: Properties of Cirrus Anvils in the Tropics. *Atm. Chem. Phys.*, 3845–3859, doi: 10.5194/acp-2016-808, 2017.
- Queney P., The problem of airflow over mountains: a summary of theoretical studies. *Bull Am Met Soc*, 29, 16–26, 1948.
- Reichler, T., Dameris, M., and Sausen, R.: Determining the tropopause height from gridded data, *Geophys. Res. Lett.*, 30, 2042, <https://doi.org/10.1029/2003GL018240>, 2003.
- Riihimaki, L. D., S. A. McFarlane, C. Liang, S.T. Massie, N. Beagley, and T.D. Toth, Comparison of methods to determine tropical tropopause layer cirrus formation mechanisms. *J. Geophys. Res.*, 117, doi: 10.1029/2011JD016832, 2012.
- Rossow, W. B., and Cairns, B.: Monitoring changes of clouds. *Climatic Change*, 31, 175–217, doi: 10.1007/BF01095151, 1995.
- Rossow, W. B., and Schiffer, R. A.: Advances in understanding clouds from ISCCP. *Bull. Amer. Meteorol. Soc.*, 80, 2261–2288, doi: 10.1175/1520-0477(1999)080<2261:AIUCF>2.0.CO;2, 1999.
- Rossow, W. B., Delo, C., and Cairns, B., Implications of the Observed Mesoscale Variations of Clouds for the Earth's Radiation Budget. *J. Climate*, 15, 557–585, doi: 10.1175/1520-0442(2002)015<0557:IOTOMV>2.0. CO;2, 2002.
- Ruzmaikin, A., Aumann, H. H., Lee, J., and Susskind, J.: Diurnal cycle variability of surface temperature inferred from AIRS data, *J. Geophys. Res.: Atmospheres*, 122, 10928–10938, doi: 10.1002/2016JD026265, 2017.

- [Scott, N. A., Chédin, A., Armante, R., Francis, J., Stubenrauch, C., Chaboureaud, J.-P., Chevallier, F., Claud, C., and Chéruy, F.: Characteristics of the TOVS Pathfinder Path-B data set. \*B. Am. Meteorol. Soc.\*, 80, 2679–2701, doi: 10.1175/1520-0477\(1999\)080<2679:COTTP>2.0.CO;2, 1999.](#)
- Soden, B. J.: The diurnal cycle of convection, clouds, and water vapour in the tropical upper troposphere, *Geophys. Res. Lett.*, 27(15), 2173–2176, doi: 10.1029/2000GL011436, 2000.
- 5 [Stephens, G. L., M. Z. Hakuba, M. J. Webb, M. Lebsock, Q. Yue, B. H. Kahn, S. Hristova-Veleva, A. D. Rapp, C. J. Stubenrauch, G. S. Elsaesser, and J. Slingo. Regional Intensification of the Tropical Hydro-logical Cycle During ENSO. \*Geophys. Res. Lett.\*, 45, 4361–4370, doi: 10.1029/2018GL077598, 2018.](#)
- [Stubenrauch, C.J., Rossow, W.B., Chéruy, F., Scott, N.A., and Chédin, A.: Clouds as seen by Infrared Sounders \(3I\) and Imagers \(ISCCP\): Part D\) Evaluation of cloud parameters. \*J. Climate\*, 12, 2189–2213, doi: 10.1175/1520-0442\(1999\)012<2189:CASBSS>2.0.CO;2, 1999a.](#)
- 10 [Stubenrauch, C. J., Chédin, A., Armante, R., and Scott, N. A.: Clouds as Seen by Satellite Sounders \(3I\) and Imagers \(ISCCP\). Part II: A New Approach for Cloud Parameter Determination in the 3I Algorithms. \*J. Climate\*, 12, 2214–2223, doi: 10.1175/1520-0442, 1999b.](#)
- 15 [Stubenrauch, C. J., Chédin, A., Rädcl, G., Scott, N. A., and Serrar, S.: Cloud properties and their seasonal and diurnal variability from TOVS Path-B. \*J. Climate\*, 19, 5531–5553, doi: 10.1175/JCLI3929.1, 2006.](#)
- [Stubenrauch, C. J., Cros, S., Guignard, A., and Lamquin, N.: A six-year global cloud climatology from the Atmospheric InfraRed Sounder aboard the Aqua Satellite: statistical analysis in synergy with CALIPSO and CloudSat. \*Atmos. Chem. Phys.\*, 10, 7197–7214, doi: 10.5194/acp-10-7197-2010, 2010.](#)
- 20 [Stubenrauch, C. J., Rossow, W. B., Kinne, S., Ackerman, S., Cesana, G., Chepfer, H., Di Girolamo, L., Getzewich, B., Guignard, A., Heidinger, A., Maddux, B. C., Menzel, W. P., Minnis, P., Pearl, C., Platnick, S., Poulsen, C., Riedi, J., Sun-Mack, S., Walther, A., Winker, D., Zeng, S., and Zhao, G.: Assessment of Global Cloud Datasets from Satellites: Project and Database Initiated by the GEWEX Radiation Panel. \*Bull. Amer. Meteor. Soc.\*, 94, 1031–1049, <https://doi.org/10.1175/BAMS-D-12-00117.1>, 2013.](#)
- 25 [Stubenrauch, C. J., Feofilov, A. G., Protopapadaki, E.-S., and Armante, R.: Cloud climatologies from the InfraRed Sounders AIRS and IASI: Strengths and Applications, \*Atmos. Chem. Phys.\*, 17, 13625–13644, doi: 10.5194/acp-17-13625-2017, 2017.](#)
- [Tian, B., Soden, B. J., Wu, X.: Diurnal cycle of convection, clouds, and water vapour in the tropical upper troposphere: Satellites versus a general circulation model, \*J. Geophys. Res.\*, 109, D10101, doi: 10.1029/2003JD004117, 2004.](#)
- [Winker, D. M., Vaughan, M.A., Omar, A.H., Hu, Y., Powell, K.A., Liu, Z., Hunt, W.H., and Young, S.A.: Overview of the CALIPSO Mission and CALIOP Data Processing Algorithms. \*J. Atmos. Oceanic Technol.\*, 26, 2310–2323, doi: 10.1175/2009JTECHA1281.1, 2009.](#)
- 30 [Wylie, D. P. and Woolf, H. M.: The Diurnal Cycle of Upper-Tropospheric Clouds Measured by GOES-VAS and the ISCCP. \*Mon. Wea. Rev.\*, 130, 171–179, \[https://doi.org/10.1175/1520-0493\\(2002\\)130<0171:TDCOUT>2.0.CO;2\]\(https://doi.org/10.1175/1520-0493\(2002\)130<0171:TDCOUT>2.0.CO;2\), 2002.](#)
- [Yang, G. Y., and Slingo, J. M.: The diurnal cycle in the Tropics, \*Mon. Wea. Rev.\*, 129, 784–801, 2001.](#)

Yorks, J. E., McGill, M. J., Palm, S. P., Hlavka, D. L., Selmer, P. A., Nowotnick, E. P., Vaughan, M. A., Rodier, S. D., and Hart, W. D., An overview of the CATS level 1 processing algorithms and data products, *Geophys. Res. Lett.*, 43, 4632–4639, doi:10.1002/2016GL068006, 2016.

5 [Zhang, Y., S. A. Klein, C. Liu, B. Tian, R. T. Marchand, J. M. Haynes, R. B. McCoy, Y. Zhang, and T. P. Ackerman, On the diurnal cycle of deep convection, high-level cloud, and upper troposphere water vapor in the Multiscale Modeling Framework, \*J. Geophys. Res.\*, 113, D16105, doi: 10.1029/2008JD009905, 2008.](#)

Zipser, E. J., Liu, C., Cecil, D. C., Nesbitt, S. W., and Yorty, D. P.: Where are the most intense thunderstorms on earth?, *B. Am. Meteorol. Soc.*, 87, 1057–1071, doi: 10.1175/BAMS-87-8-1057, 2006.
